# Supplementary material for: Synthesis of β- and γ-carbolines via ruthenium and rhodium catalysed [2+2+2] cycloadditions of yne-ynamides with methylcyanoformate
Source: Royal Society of Chemistry journal article supplement (doi:10.1039/c1cc11298h), 2011-01-01

## Supplementary Information

### Synthesis of $\beta$ - and $\gamma$ -carbolines via ruthenium and rhodium catalysed [2+2+2] cycloadditions of yne-ynamides with methylcyanoformate

Felix Nissen, Vincent Richard, Carole Alayrac and Bernhard Witulski\*,

Laboratoire de Chimie Moléculaire et Thio-organique, UMR CNRS 6507, INC3M, FR 3038, ENSICAEN  
& Université de Caen, 6 Boulevard du Maréchal Juin, 14050 Caen, France.

E-mail: [bernhard.witulski@ensicaen.fr](mailto:bernhard.witulski@ensicaen.fr)

- I. Synthesis of substituted yne-ynamides
  - a) via methylation (compounds **2**, **3**, and **4**)
  - b) via Negishi reactions (compounds **5a-d** and **6a-d**)
  - c) Synthesis of yne-ynamide **14**
- II. General procedures for the [2+2+2] cycloaddition reaction of yne-ynamides with methylcyanoformate to afford  $\beta$ - or  $\gamma$ -carbolines (compounds **7**, **8a-d**, **10**, **11**, **13**, **15**, and **17**)
- III. Synthesis of the marine alkaloid Eudistomin U (**22**)
- IV. Selected NMR spectra

**General:** All reactions were performed under an atmosphere of dry nitrogen. Commercially available reagents were used without further purification. Solvents (THF, toluene, diethyl ether,  $\text{CH}_2\text{Cl}_2$ ) were purified by an Innovative Technology Pure Solvent Device (activated alumina column containing a copper catalyst and molecular sieves) and were degassed. Reactions were magnetically stirred and monitored by thin layer chromatography on Merck silica gel 60-F54 coated 0.25 mm plates. Flash chromatography was performed with Merck silica gel 60 (particle size 40-60  $\mu\text{m}$ ). Yields reported refer to isolated and purified compounds. IR spectra were recorded on a Perkin Elmer spectrometer with an ATR set-up. NMR spectra were recorded using a 400 or 500 MHz Bruker Avance III spectrometer, or a Bruker AC300, ARX400, or AMX400 spectrometer. Mass spectra were obtained on a Q-TOF Micro WATERS under electron spray ionisation (ESI) and a Varian MAT 311 spectrometer. Microanalyses were recorded using a Vario Micro Cube from Elementar. Melting points are uncorrected.  $\text{Cp}^*\text{RuCl}(\text{cod})^1$  and 3-iodo-1-[(4-methylphenyl)sulphonyl]-1H-indole<sup>2</sup> were prepared according to literature procedures.

<sup>1</sup> N. Oshima, H. Suzuki, Y. Moro-oka, *Chem. Lett.* 1984, 1161-1164.

<sup>2</sup> B. Witulski, N. Buschmann, U. Bergsträßer, *Tetrahedron* 2000, **56**, 8473-8480.

## I. Synthesis of substituted yne-ynamides:

The following yne-ynamides were synthesized as described previously,<sup>3</sup>

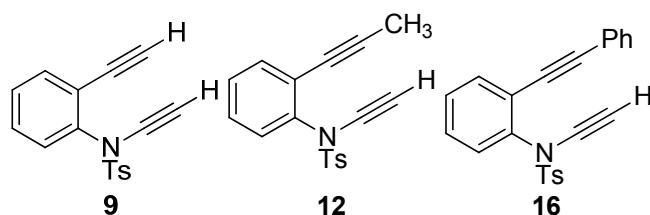

### Ia via methylation (compounds 2, 3, and 4)

#### **4-Methyl-N-prop-1-ynyl-N-(2-trimethylsilanylethynyl-phenyl)-benzenesulfonamide (2)**

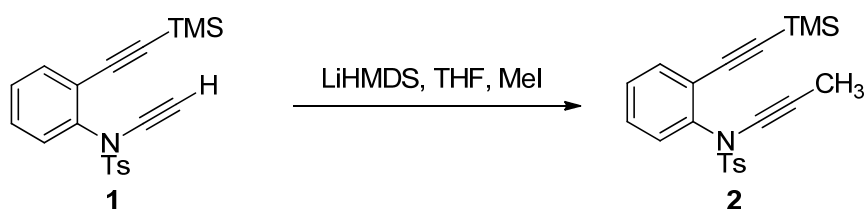

To a solution of **1** (463 mg, 1.26 mmol) in dry THF (16 mL) was added LiHMDS (3.8 mL of a 0.5 M solution in THF) under N<sub>2</sub> at -78 °C. The reaction mixture was gradually taken to -40 °C and kept at this temperature for 1 h. Then a solution of MeI (314 μL, 5 mmol) in dry THF (6.5 mL) was added at -40 °C. The temperature was slowly raised to -5 °C and then the cold bath was replaced by an ice bath and the reaction mixture was allowed to warm up to room temperature overnight. The reaction mixture was worked up by the addition of diethyl ether and brine, separation of the layers and extraction of the aqueous layer with diethyl ether. The combined organic layers were dried with MgSO<sub>4</sub>, filtered and concentrated under reduced pressure. The obtained residue was purified by flash chromatography (9:1 pentane/diethyl ether) to afford **2** (466 mg, 97% yield) as a white solid, mp 81 °C.

<sup>1</sup>H NMR (300 MHz; CDCl<sub>3</sub>): δ<sub>H</sub> 0.17 (9 H, s), 1.89 (3 H, s), 2.44 (3 H, s), 7.23–7.30 (5 H, m), 7.45–7.48 (1 H, m), 7.69 (2 H, d, *J* = 8.4 Hz). <sup>13</sup>C NMR (75 MHz; CDCl<sub>3</sub>): δ<sub>C</sub> -0.3 (q), 3.3 (q), 21.6 (q), 65.4 (s), 72.1 (s), 100.2 (s), 100.9 (s), 122.3 (d), 128.4 (d), 128.8 (d), 129.0 (d), 129.4 (d, 2 peaks), 133.9 (d), 134.9 (s), 139.8 (d), 144.3 (s); IR (KBr):  $\tilde{\nu}_{\text{max}}/\text{cm}^{-1}$  = 3060, 2963, 2916, 2362, 2259, 2159, 1597, 1481, 1446, 1365, 1247, 1166, 1091, 926. MS [ESI (+)]: *m/z* (%) = 382 ([M+H]<sup>+</sup>, 36), 102 (100); HRMS [ESI (+)]: Mass calcd for C<sub>21</sub>H<sub>23</sub>NO<sub>2</sub>SSiNa [M+Na]<sup>+</sup>, 404.1111; found, 404.1139.

#### **N-(2-Ethynyl-phenyl)-4-methyl-N-prop-1-ynyl-benzenesulfonamide (3)**

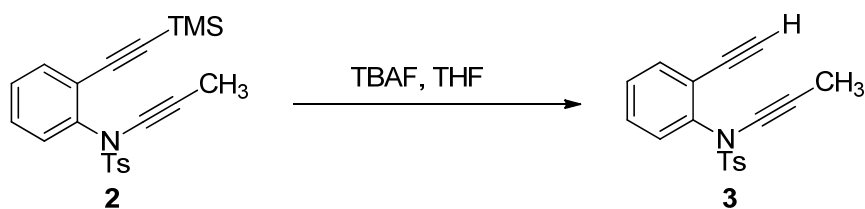

A solution of **2** (226 mg, 0.59 mmol) in THF (15 mL) was purged by bubbling N<sub>2</sub> through it for 15 min then cooled down to 0 °C. A 1 M solution of TBAF in THF (0.77 mL, 0.77 mmol) was added dropwise. After 15 min

<sup>3</sup> B. Witulski, C. Alayrac, *Angew. Chem. Int. Ed.* **2002**, *41*, 3281-3284.

the reaction mixture was worked up by addition of Et<sub>2</sub>O and brine, separation of the layers and extraction of the aqueous layer with Et<sub>2</sub>O. The combined organic layers were drying with MgSO<sub>4</sub>, filtered and concentrated under reduced pressure. Purification of the obtained residue by flash chromatography (pentane/Et<sub>2</sub>O) afforded **3** (164 mg, 90% yield) as white solid, mp 111 °C, R<sub>f</sub> 0.8 (1:2 pentane/Et<sub>2</sub>O).

<sup>1</sup>H NMR (400 MHz; CDCl<sub>3</sub>): δ<sub>H</sub> 1.88 (3 H, s), 2.45 (3 H, s), 3.08 (1 H, s), 7.13–7.15 (1 H, m), 7.29–7.32 (4 H, m), 7.49–7.52 (1 H, m), 7.70 (2 H, d, *J* = 8.4 Hz). <sup>13</sup>C NMR (100 MHz; CDCl<sub>3</sub>): δ<sub>C</sub> 3.2 (q), 21.6 (q), 65.3 (s), 72.1 (s), 79.4 (s), 82.7 (s), 122.4 (s), 128.4 (d), 128.7 (d), 129.4 (d), 129.4 (d), 129.5 (d), 134.0 (d), 134.3 (s), 140.3 (s), 144.6 (s); IR (KBr):  $\tilde{\nu}_{\text{max}}/\text{cm}^{-1}$  = 3256, 2255, 2109, 1595, 1483, 1444, 1366, 1297, 1172, 1090, 930. MS (EI): *m/z* (%) = 309 (M<sup>+</sup>, 7%), 271 (15), 245 (7), 213 (4), 198 (3), 154 (100), 128 (44), 101 (33), 91 (32), 57 (16). Anal calcd for C<sub>18</sub>H<sub>15</sub>NO<sub>2</sub>S (309.38 g mol<sup>-1</sup>); C, 69.88; H, 4.89; N, 4.5; Found: C, 69.76; H, 4.68; N, 4.36.

#### 4-Methyl-*N*-prop-1-ynyl-*N*-(2-prop-1-ynyl-phenyl)-benzenesulfonamide (**4**)

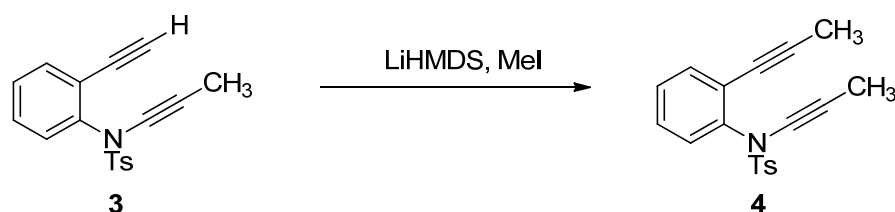

To a solution of **3** (103 mg, 0.33 mmol) in dry THF (4.2 mL) at –78 °C was added dropwise a 0.5 M solution of LiHMDS in THF (1.0 mL, 0.5 mmol). The reaction mixture was gradually taken to –40 °C and kept at this temperature for 1 h. Then a solution of MeI (83 μL, 1.33 mmol) in dry THF (1.7 mL) was added dropwise at –40 °C. The temperature was slowly raised to –5 °C and then the reaction mixture was allowed to warm up to rt overnight. The reaction mixture was worked up by addition of diethyl ether and brine, separation of the layers and extraction of the aqueous layer with diethyl ether and then drying of the combined organic layers with MgSO<sub>4</sub>. Purification by flash chromatography (7:3 pentane/diethyl ether) afforded **4** as a colourless solid (98 mg, 0.30 mmol, 92% yield); mp 90–91 °C (Et<sub>2</sub>O/hexane); R<sub>f</sub> 0.35 (7:3 pentane/Et<sub>2</sub>O).

<sup>1</sup>H NMR (400 MHz, CDCl<sub>3</sub>) δ 7.72 (d, *J* = 8.3 Hz, 2 H), 7.39–7.37 (m, 1 H), 7.31 (d, *J* = 8.3 Hz, 2 H), 7.27–7.19 (m, 3 H), 2.46 (s, 3 H), 1.91 (s, 3 H), 1.84 (s, 3 H); <sup>13</sup>C NMR (100 MHz, CDCl<sub>3</sub>) δ 144.4 (s), 139.7 (s), 135.0 (s), 133.5 (d), 129.5 (d), 129.3 (d), 128.8 (d), 128.6 (d), 128.3 (d), 123.9 (s), 92.3 (s), 75.6 (s), 72.4 (s), 65.3 (s), 21.8 (q), 4.6 (q), 3.5 (q); IR (neat):  $\tilde{\nu}_{\text{max}}/\text{cm}^{-1}$  = 2916, 2256, 1596, 1488, 1443, 1364, 1169, 1085, 910, 666; MS [ESI (+)]: *m/z* = 324 (100, M+1), 169 (50), 155 (80); HRMS [ESI (+)]: Mass calcd for C<sub>19</sub>H<sub>18</sub>NO<sub>2</sub>S (MH<sup>+</sup>) 324.1058; found 324.1051.

#### Ib) via Negishi reactions (compounds **5a-d** and **6a-d**)

##### General procedure for Negishi reactions with yne-ynamide **1**:

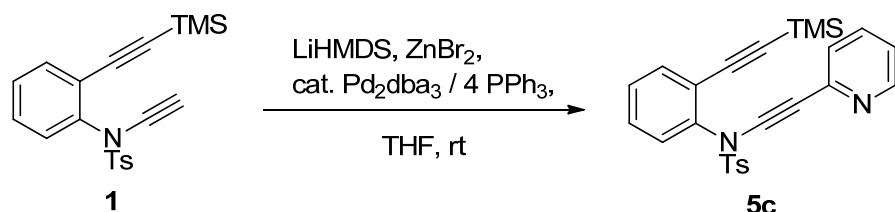

Freshly prepared LiHMDS (0.8 mL of a 0.5 M solution in THF, 0.40 mmol) was added to a solution of **1** (98 mg, 0.27 mmol) in dry THF (3.4 mL) at –78 °C and stirred for 40 min at –40 °C. Thereafter, a solution of ZnBr<sub>2</sub> (66 mg, 0.29 mmol, 1.1 equiv.) in THF (0.2 mL) was added and the reaction mixture was stirred without cooling for

20 min and then transferred via canula to a solution of  $[\text{Pd}_2(\text{dba})_3]$  (11.4 mg, 0.012 mmol, 5 mol%),  $\text{PPh}_3$  (13.7 mg, 0.052 mmol, 20 mol%) and 2-iodopyridine (66 mg, 0.32 mmol) in dry THF (2.5 mL). After stirring for 12 h at room temperature, brine was added and the aqueous phase extracted with  $\text{Et}_2\text{O}$ . The combined organic layers were dried with  $\text{MgSO}_4$ , filtered and concentrated under reduced pressure. Purification of the obtained residue by flash chromatography (7:3 to 6:4 pentane/ethyl acetate) afforded yne-ynamide **5c** (104 mg, 0.23 mmol, 87% yield) as a viscous yellow oil;  $R_f$  0.3 (7:3 pentane/ethyl acetate).

$^1\text{H}$  NMR (400 MHz,  $\text{CDCl}_3$ )  $\delta$  8.49 (ddd,  $J = 4.9$  Hz,  $J = 1.7$  Hz,  $J = 0.9$  Hz, 1 H), 7.76 (d,  $J = 8.4$  Hz, 2 H), 7.58 (ddd,  $J = 7.8$  Hz,  $J = 7.7$  Hz,  $J = 1.8$  Hz, 1 H), 7.51-7.47 (m, 1 H), 7.34-7.30 (m, 6 H), 7.12 (ddd,  $J = 7.6$  Hz,  $J = 4.9$  Hz,  $J = 1.2$  Hz, 1 H), 2.44 (s, 3 H), 0.06 (s, 9 H);  $^{13}\text{C}$  NMR (100 MHz,  $\text{CDCl}_3$ )  $\delta$  149.9 (d), 145.0 (s), 143.9 (s), 138.9 (s), 135.9 (d), 134.7 (s), 134.2 (d), 129.9 (d), 129.27 (d), 129.25 (d), 129.1 (d), 128.7 (d), 126.2 (d), 123.2 (s), 121.9 (d), 101.7 (s), 99.8 (s), 83.0 (s), 71.3 (s), 21.9 (q), -0.3 (q); IR (neat)  $\tilde{\nu}_{\text{max}}/\text{cm}^{-1} = 3064, 2960, 2237, 2163, 1583, 1483, 1469, 1445, 1373, 1171, 1083, 842$ ; MS [ESI (+)]:  $m/z = 445$  (50, M+1), 306 (100); HRMS [ESI (+)]: Mass calcd for  $\text{C}_{25}\text{H}_{25}\text{N}_2\text{O}_2\text{SSi}$  (M+H) 445.1406; found 445.1395.

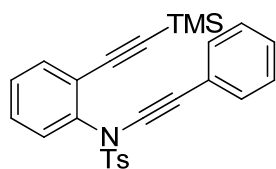

**5a**

Yne-ynamide **5a** (110 mg, 0.25 mmol, 91% yield) was obtained after flash chromatography (97:3 cyclohexane/ethyl acetate) as an oil;  $R_f$  0.1 (95:5 cyclohexane/ethyl acetate).

$^1\text{H}$  NMR (400 MHz,  $\text{CDCl}_3$ )  $\delta$  7.77 (d,  $J = 8.3$  Hz, 2H), 7.53 (m, 1H), 7.38 – 7.25 (m, 9H), 2.46 (s, 3H), 0.10 (s, 9H);  $^{13}\text{C}$  NMR (100MHz,  $\text{CDCl}_3$ )  $\delta$  144.8 (s), 139.4 (s), 134.7 (s), 134.2 (d), 131.2 (d), 129.8 (d), 129.3 (2 d), 129.3 (d), 128.9 (d), 128.7 (d), 128.2 (d), 127.6 (d), 123.2 (s), 122.9 (s), 101.5 (s), 99.9 (s), 82.6 (s), 70.7 (s), 21.9 (q), -0.3 (q); IR (neat)  $\tilde{\nu}_{\text{max}}/\text{cm}^{-1} = 3064, 3034, 2960, 2899, 2240, 2163, 1598, 1483, 1444, 1374, 1249, 1171, 1091$ ; MS [ESI (+)]:  $m/z$  (%) = 444 (100%, M+H<sup>+</sup>), 289 (30), 288 (10), 216 (70); HRMS [ESI (+)]: Mass calcd for  $\text{C}_{26}\text{H}_{26}\text{NO}_2\text{SSi}$  (M+H), 444.1454; found 444.1437.

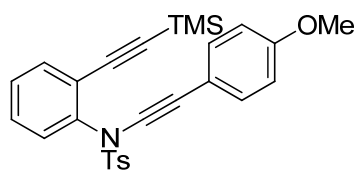

**5b**

Yne-ynamide **5b** (100 mg, 0.25 mmol, 92% yield) was obtained after flash chromatography (9:1 cyclohexane/ethyl acetate) as an oil;  $R_f$ : 0.15 (9:1 cyclohexane/ethyl acetate).

$^1\text{H}$  NMR (400 MHz,  $\text{CDCl}_3$ )  $\delta$  7.75 (d,  $J = 8.3$  Hz, 2H), 7.53 (m, 1H), 7.33 – 7.29 (m, 8H), 3.79 (s, 3H), 2.45 (s, 3H), 0.12 (s, 9H);  $^{13}\text{C}$  NMR (100MHz,  $\text{CDCl}_3$ )  $\delta$  159.4 (s), 144.7 (s), 139.7 (s), 134.9 (s), 134.3 (s), 133.3 (d), 129.7 (d), 129.3 (d), 129.2 (d), 128.8 (s), 128.7 (d), 123.1 (d), 115.2 (d), 113.9 (d), 101.4 (s), 100.2 (s), 81.2 (s), 70.2 (s), 55.4 (q), 21.9 (q), -0.1 (q); MS [ESI (+)]:  $m/z$  (%) = 474 (100, [M+H]<sup>+</sup>) 319 (61), 146 (85); HRMS [ESI (+)]: Mass Calcd for  $\text{C}_{27}\text{H}_{27}\text{NO}_3\text{SSi}$  (M+H) 474.1559; found 474.1542.

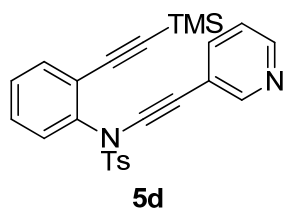

**5d** (96 mg, 0.22 mmol, 81% yield) was obtained after flash chromatography (1:1 pentane/ethyl acetate) as a pale yellow solid (mp 77-79 °C),  $R_f$  0.4 (1:1 pentane/ethyl acetate).

$^1\text{H}$  NMR (400 MHz,  $\text{CDCl}_3$ )  $\delta$  8.56 (dd,  $J = 2.1$  Hz,  $J = 0.8$  Hz, 1 H), 8.45 (dd,  $J = 4.9$  Hz,  $J = 1.7$  Hz, 1 H), 7.73 (d,  $J = 8.4$  Hz, 2 H), 7.62 (ddd,  $J = 8.2$  Hz,  $J = 2.0$  Hz,  $J = 1.8$  Hz, 1 H), 7.52-7.50 (m, 1 H), 7.39-7.30 (m, 5 H), 7.19 (ddd,  $J = 7.9$  Hz,  $J = 4.9$  Hz,  $J = 0.9$  Hz, 1 H), 2.45 (s, 3 H), 0.06 (s, 9 H);  $^{13}\text{C}$  NMR (100 MHz,  $\text{CDCl}_3$ )  $\delta$  151.8 (d), 148.0 (d), 145.1 (s), 138.9 (s), 137.9 (d), 134.6 (s), 134.3 (d), 129.9 (d), 129.4 (d), 129.3 (d), 129.1 (d), 128.7 (d), 123.0 (d), 122.9 (s), 120.6 (s), 101.7 (s), 99.8 (s), 85.7 (s), 67.8 (s), 21.9 (q), -0.2 (q); IR (neat):  $\tilde{\nu}_{\text{max}}/\text{cm}^{-1} = 3031, 2960, 2238, 2165, 1595, 1481, 1444, 1405, 1365, 1171, 1079, 843$ ; MS [ESI (+)]:  $m/z = 445$  (90, M+H), 231 (100); HRMS [ESI (+)]: MS calcd for  $\text{C}_{25}\text{H}_{25}\text{N}_2\text{O}_2\text{SSi}$  (M+H) 445.1406; found 445.1423.

#### General procedure for the desilylation reaction of silylated ynamides:

##### *N*-(2-Ethynylphenyl)-4-methyl-*N*-pyridin-2-ylethynylbenzenesulfonamide (**6c**)

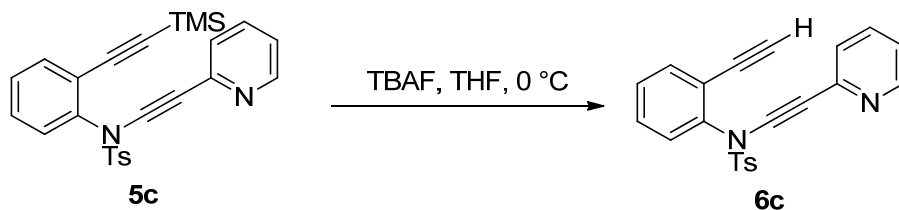

A 1 M solution of TBAF in THF (0.2 mL, 0.20 mmol) was added to a solution of **5c** (67 mg, 0.15 mmol) in THF (3 mL) at 0 °C. After 15 min, the reaction mixture was worked up by addition of diethyl ether and brine. Separation of the layers and extraction of the aqueous layer with diethyl ether was followed by drying the combined organic layers with  $\text{MgSO}_4$ . After removal of the solvents under reduced pressure the obtained crude product was purified by flash chromatography (1:1 silica gel, pentane/ethyl acetate) to afford **6c** (51 mg, 0.14 mmol, 90% yield) as a white solid;  $R_f$  0.4 (1:1 pentane/ethyl acetate); mp 113-114 °C ( $\text{CHCl}_3$ /pentane).

$^1\text{H}$  NMR (400 MHz,  $\text{CDCl}_3$ )  $\delta$  8.50 (ddd,  $J = 4.9$  Hz,  $J = 1.7$  Hz,  $J = 0.9$  Hz, 1 H), 7.77 (d,  $J = 8.3$  Hz, 2 H), 7.59 (td,  $J = 7.8$  Hz,  $J = 1.8$  Hz, 1 H), 7.54-7.51 (m, 1 H), 7.37-7.31 (m, 5 H), 7.27-7.24 (m, 1 H), 7.14 (ddd,  $J = 7.6$  Hz,  $J = 4.9$  Hz,  $J = 1.2$  Hz, 1 H), 3.06 (s, 1 H), 2.45 (s, 3 H);  $^{13}\text{C}$  NMR (100 MHz,  $\text{CDCl}_3$ )  $\delta$  149.9 (d), 145.3 (s), 143.6 (s), 139.4 (s), 136.0 (d), 134.3 (d), 134.2 (s), 129.83 (d), 129.76 (d), 129.4 (d), 129.2 (d), 128.7 (d), 126.6 (d), 122.6 (s), 122.2 (d), 83.3 (d), 82.9 (s), 78.8 (s), 70.7 (s), 21.8 (q); IR (neat):  $\tilde{\nu}_{\text{max}}/\text{cm}^{-1} = 3255, 2242, 1588, 1482, 1469, 1443, 1376, 1173, 1114, 1080, 921$ ; MS [ESI (+)]:  $m/z$  (%) = 373 (100, M+H), 347 (20), 234 (45), 218 (75); HRMS [ESI (+)]: Mass calcd for  $\text{C}_{22}\text{H}_{17}\text{N}_2\text{O}_2\text{S}$  (M+H), 373.1011; found, 373.1015.

***N*-(2-Ethynyl-phenyl)-4-methyl-*N*-phenylethynyl-benzenesulfonamide (6a)**

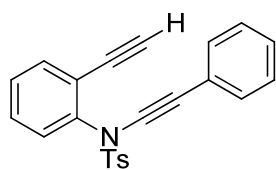

**6a**

Yne-ynamide **6a** (270 mg, 0.73 mmol, 87%) was obtained after flash chromatography (6:1 pentane/diethyl ether) as a solid,  $R_f$  0.51 (1:1 pentane/diethyl ether); mp 132-133 °C (pentane/ $\text{CHCl}_3$ ).

$^1\text{H}$  NMR (400 MHz,  $\text{CDCl}_3$ ):  $\delta$  7.75 (d,  $J = 8.3$  Hz, 2H), 7.53-7.51 (m, 1H), 7.38-7.24 (m, 10H), 3.04 (s, 1H), 2.44 (s, 3H);  $^{13}\text{C}$  NMR (100 MHz,  $\text{CDCl}_3$ ):  $\delta$  145.1 (s), 140.0 (s), 134.4 (d), 134.2 (s), 131.6 (d), 129.7 (d), 129.3 (d), 129.1 (d), 128.8 (d), 128.3 (d), 128.0 (d), 127.4 (d), 123.0 (s), 122.3 (s), 83.2 (d), 82.7 (s), 79.0 (s), 70.4 (s), 21.9 (q); IR (KBr):  $\tilde{\nu}_{\text{max}}/\text{cm}^{-1} = 3265, 2236, 1596, 1486, 1441, 1369, 117$ ; MS [ESI (+)]:  $m/z = 371$  (100,  $\text{M}^+$ ); HRMS [ESI (+)]: Mass calcd for  $\text{C}_{23}\text{H}_{18}\text{NO}_2\text{S}$  (M+H), 372.1058; found, 372.1049.

***N*-(2-Ethynyl-phenyl)-*N*-(4-methoxy-phenylethynyl)-4-methyl-benzenesulfonamide (6b)**

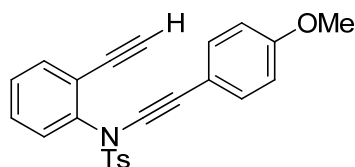

**6b**

Yne-ynamide **6b** (100 mg, 0.25 mmol, 80% yield) was obtained after flash chromatography (8:2 cyclohexane/ethyl acetate) as a solid;  $R_f$  0.27 (8:2 cyclohexane/ethyl acetate), mp 106 °C (pentane/ $\text{CHCl}_3$ ).

$^1\text{H}$  NMR (400 MHz,  $\text{CDCl}_3$ )  $\delta$  7.75 (d,  $J = 8.3$  Hz, 2H), 7.54 – 7.51 (m, 1H), 7.39 – 7.27 (m, 7H), 6.81 (d,  $J = 8.3$  Hz, 2H), 3.80 (s, 3H), 3.05 (s, 1H), 2.47 (s, 3H);  $^{13}\text{C}$  NMR (100MHz,  $\text{CDCl}_3$ )  $\delta$  159.7 (s), 145.0 (s), 140.3 (s), 134.4 (d), 134.3 (d), 133.7 (d), 129.7 (d), 129.6 (d), 129.3 (d), 129.0 (d), 128.8 (d), 122.4 (s), 114.9 (s), 114.0 (d), 83.1 (s), 81.3 (s), 79.1 (s), 70.1 (s), 55.4 (q), 21.9 (q); IR (neat):  $\tilde{\nu}_{\text{max}}/\text{cm}^{-1} = 3263, 2235, 2114, 1602, 1509, 1478, 1362, 1246, 1163, 1087, 1031, 916$ ; MS [ESI (+)]  $m/z$  (%) = 402 (100,  $\text{M}+\text{H}^+$ ), 247 (50); HRMS [ESI (+)]: Mass calcd for  $\text{C}_{24}\text{H}_{20}\text{NO}_3\text{S}$  (M+H), 402.1164; found 402.1167.

***N*-(2-Ethynyl-phenyl)-4-methyl-*N*-pyridin-3-ylethynyl-benzenesulfonamide (6d)**

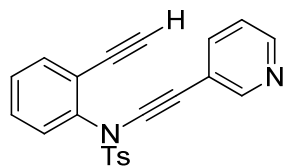

**6d**

**6d** (41 mg, 0.11 mmol, 92% yield) was obtained after flash chromatography (1:1 pentane/ethyl acetate) as a white solid;  $R_f$  0.3 (1:1 pentane/ethyl acetate), mp 111-112 °C ( $\text{CHCl}_3$ /pentane).

$^1\text{H}$  NMR (400 MHz,  $\text{CDCl}_3$ )  $\delta$  8.57 (d,  $J = 1.4$  Hz, 1 H), 8.47 (dd,  $J = 4.8$  Hz,  $J = 1.5$  Hz, 1 H), 7.74 (d,  $J = 8.3$  Hz, 2 H), 7.65 (ddd,  $J = 7.9$  Hz,  $J = 2.0$  Hz,  $J = 1.8$  Hz, 1 H), 7.54-7.52 (m, 1 H), 7.40-7.31 (m, 5 H), 7.20 (ddd,  $J = 7.9$  Hz,  $J = 4.9$  Hz,  $J = 0.8$  Hz, 1 H), 3.02 (s, 1 H), 2.46 (s, 3 H);  $^{13}\text{C}$  NMR (100 MHz,  $\text{CDCl}_3$ )  $\delta$  152.3 (d), 148.3 (d), 145.4 (s), 139.5 (s), 138.4 (d), 134.4 (d), 134.1 (s), 129.84 (d), 129.83 (d), 129.4 (d), 129.3 (d), 128.7 (d), 123.1 (d), 122.2 (s), 120.3 (s), 85.7 (s), 83.3 (d), 78.8 (s), 67.5 (s), 21.9 (q); IR (neat):  $\tilde{\nu}_{\text{max}}/\text{cm}^{-1} = 3261,$

2233, 1595, 1485, 1442, 1371, 1173, 1109, 1087, 1069, 911, 803; MS [ESI (+)]:  $m/z$  (%) = 373 (100, M+H), 234 (20), 218 (60); HRMS [ESI (+)]: Mass calcd for  $C_{22}H_{17}N_2O_2S$  (M+H), 373.1011; found, 373.1007.

### Ic) Synthesis of yne-ynamide **14**

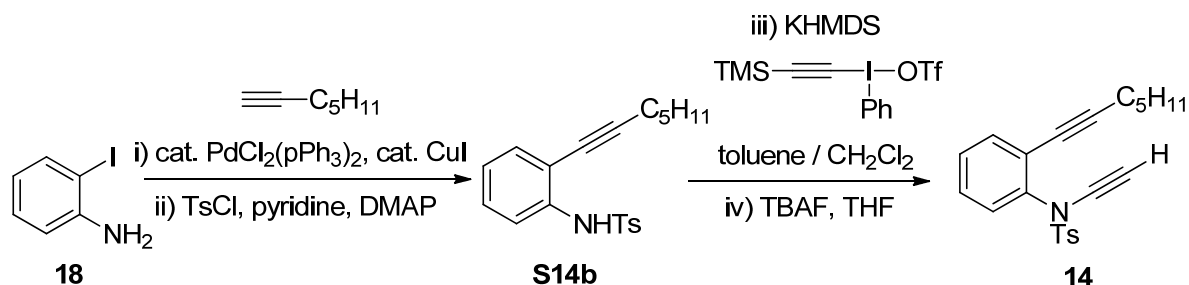

### 2-Hept-1-ynyl-phenylamine (**S14a**)

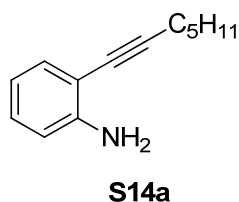

1-heptyne (1.392 g, 14.50 mmol) was added to a solution of 2-iodoaniline **18** (2.65 g, 12.10 mmol),  $PdCl_2(PPh_3)_2$  (410 mg, 0.61 mmol) and  $CuI$  (224 mg, 1.210 mmol) in DMF (14 mL) and  $NEt_3$  (25 mL) and was stirred at room temperature over night. The solvent was removed under reduced pressure and  $H_2O$  and  $CH_2Cl_2$  were added to the obtained residue. The product was extracted with  $CH_2Cl_2$ . The combined organic layers were dried with  $MgSO_4$ , filtered and the solvent was removed under reduced pressure. Flash chromatography (10:1 pentane/diethyl ether) afforded **S14a** (1.930 g, 10.30 mmol, 85%) as a colourless oil,  $R_f$  0.19 (10:1 pentane/diethyl ether).

$^1H$  NMR (400 MHz,  $CDCl_3$ ):  $\delta$  1.01 (t,  $J = 7.4$  Hz, 3H), 1.46 (m, 2H), 1.53 (m, 2H), 1.73 (m, 2H), 2.54 (t,  $J = 7.1$  Hz, 2H), 4.23 (s, 2H), 6.72-6.77 (m, 2H), 7.15 (m, 1H), 7.33 (m, 1H).  $^{13}C$  NMR (100 MHz,  $CDCl_3$ ):  $\delta$  147.6 (s), 131.9 (d), 128.7 (d), 117.7 (d), 114.1 (d), 108.9 (s), 95.7 (s), 77.0 (s), 31.1 (t), 28.6 (t), 22.2 (t), 19.5 (t), 13.9 (q). IR (neat):  $\tilde{\nu}_{max}/cm^{-1} = 3475, 3380, 3029, 2931, 2859, 1614, 1493, 1456, 1306, 748$ . MS [ESI (+)]:  $m/z = 188 [M+H]^+$ .

### N-(2-Hept-1-ynyl-phenyl)-4-methyl-benzenesulfonamide (**S14b**)

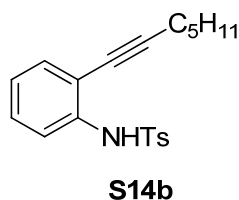

Tosylchloride (2.150 g, 11.30 mmol) was added to a solution of **S14a** (1.760 g, 9.40 mmol) in dry THF (40 mL) and dry pyridine (20 mL) and the resulting mixture was stirred at room temperature over night. Thereafter,  $H_2O$  (200 mL) and  $CH_2Cl_2$  (30 mL) were added and the product was extracted with  $CH_2Cl_2$ . The combined organic layers were washed with brine, dried with  $MgSO_4$ , filtered and the solvent was removed under reduced pressure. Flash chromatography (4:1 pentane/diethyl ether) afforded **S14b** (2.420 g, 7.10 mmol, 75 % yield) as a solid,  $R_f$  0.55 (6:1 pentane/diethyl ether), mp 66-67 °C (pentane/ $CH_2Cl_2$ ).

$^1\text{H}$  NMR (300 MHz,  $\text{CDCl}_3$ ):  $\delta$  0.94 (d,  $J = 6.9$  Hz, 3H), 1.36-1.45 (m, 4H), 1.55-1.64 (m, 2H), 2.35 (s, 3H), 2.40 (t,  $J = 7.1$  Hz, 2H), 6.96 (m, 1H), 7.26-7.16 (m, 5H), 7.56 (d,  $J = 8.3$  Hz, 1H), 7.66 (d,  $J = 8.3$  Hz, 2H).  $^{13}\text{C}$  NMR (100 MHz,  $\text{CDCl}_3$ ):  $\delta$  143.9 (s), 137.7 (s), 136.3 (s), 131.9 (d), 129.6 (d), 128.8 (d), 127.3 (d), 124.2 (d), 119.3 (d), 114.9 (s), 98.0 (s), 75.4 (s), 31.2 (t), 28.4 (t), 22.2 (q), 21.5 (t), 19.6 (t), 14.0 (q). IR (KBr):  $\tilde{\nu}_{\text{max}}/\text{cm}^{-1} = 3264, 2957, 2937, 2870, 1496, 1399, 1340, 1165, 918$ . MS [ESI (+)]:  $m/z = 364$   $[\text{M}+\text{Na}]^+$ . HRMS [ESI (+)]: Mass calcd for  $\text{C}_{20}\text{H}_{23}\text{NO}_2\text{SNa}$   $[\text{M}+\text{Na}]^+$ , 364.1347, found, 364.1358.

***N*-(2-Hept-1-ynyl-phenyl)-4-methyl-*N*-trimethylsilanylethynyl-benzenesulfonamide (S14c)**

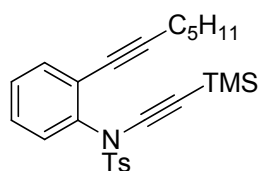

**S14c**

KHMDS (3.5 mL of 0.5 M solution in toluene) was added dropwise to a solution of **S14b** (500 mg, 1.50 mmol) in dry toluene (150 mL) at 0 °C. After 15 min a solution of (trimethylsilyl)ethynyl phenyliodonium triflate (878 mg, 1.95 mmol) in dry  $\text{CH}_2\text{Cl}_2$  (60 mL) was added and the resulting reaction mixture was stirred over night at room temperature. After completion of reaction the solvents were removed under reduced pressure and  $\text{H}_2\text{O}$  and  $\text{CH}_2\text{Cl}_2$  were added to the obtained residue. The product was extracted with  $\text{CH}_2\text{Cl}_2$  and the combined organic layers were washed with brine, dried with  $\text{MgSO}_4$ , filtered and concentrated under reduced pressure. The obtained crude product was purified by flash chromatography (4:1 pentane/diethyl ether) to afford **S14c** (320 mg, 0.7 mmol, 50% yield) as colourless oil,  $R_f$  0.3 (15:1 pentane/diethyl ether).

$^1\text{H}$  NMR (300 MHz,  $\text{CDCl}_3$ ):  $\delta$  0.14 (s, 9H), 0.91 (t,  $J = 6.9$  Hz, 3H), 1.25-1.37 (m, 4H), 1.45-1.53 (m, 2H), 2.15 (t,  $J = 6.5$  Hz, 2H), 2.45 (s, 3H), 7.23-7.28 (m, 5H), 7.28-7.40 (d,  $J = 8.8$  Hz, 1H), 7.72 (d,  $J = 8.4$  Hz, 2H);  $^{13}\text{C}$  NMR (100 MHz,  $\text{CDCl}_3$ ):  $\delta$  144.4, 138.6, 134.7, 133.4, 129.2, 128.9, 128.7, 128.6, 128.0, 123.8, 96.9, 94.7, 76.0, 72.5, 31.2, 28.2, 22.1, 21.5, 19.5, 13.9, 0.03; HRMS [ESI (+)]: Mass calcd for  $\text{C}_{25}\text{H}_{31}\text{NO}_2\text{SSiNa}$   $[\text{M}+\text{Na}]^+$ , 460.1742; found, 460.1742.

***N*-Ethynyl-*N*-(2-hept-1-ynyl-phenyl)-4-methyl-benzenesulfonamide (14)**

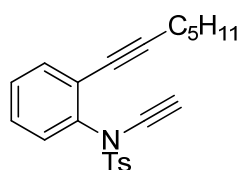

**14**

To a solution of **S14c** (2.210 g, 5.00 mmol) in THF (20 mL) was added TBAF (6.6 mL of 1 M solution in THF) at 0 °C. After 15 min stirring at 0 °C diethyl ether and brine were added. The product was extracted with diethyl ether, the combined organic layers dried with  $\text{MgSO}_4$ , filtrated and concentrated under reduced pressure. The obtained crude product was purified with flash chromatography (13:1 pentane/diethyl ether) to afford yne-namide **14** (1.530 g, 4.20 mmol, 83% yield) as a colourless oil,  $R_f$  0.18 (15:1 pentane/diethyl ether).

$^1\text{H}$  NMR (400 MHz,  $\text{CDCl}_3$ ):  $\delta$  0.91 (t,  $J = 7.1$  Hz, 3H), 1.25-1.37 (m, 4H), 1.40-1.51 (m, 2H), 2.17 (t,  $J = 6.5$  Hz, 2H), 2.45 (s, 3H), 2.81 (s, 1H), 7.16-7.33 (m, 5H), 7.40 (m, 1H), 7.73 (d,  $J = 8.4$  Hz, 2H);  $^{13}\text{C}$  NMR (100 MHz,  $\text{CDCl}_3$ ):  $\delta$  144.6, 138.3, 134.8, 133.4, 129.4, 129.1, 128.9, 128.4, 128.1, 123.9, 97.2, 75.9, 75.9, 58.4, 31.0, 28.0, 22.1, 21.5, 19.5, 13.9; HRMS [ESI (+)]: Mass calcd for  $\text{C}_{22}\text{H}_{23}\text{NO}_2\text{SNa}$   $[\text{M}+\text{Na}]^+$ , 388.1347; found, 388.1320.



General procedures for the [2+2+2] cycloaddition reactions of yne-ynamides with methylcyanoformate to afford  $\beta$ - or  $\gamma$ -carbolines (compounds **7**, **8a-e**, **10**, **11**, **13**, **15**, and **17**)

**Method A:**

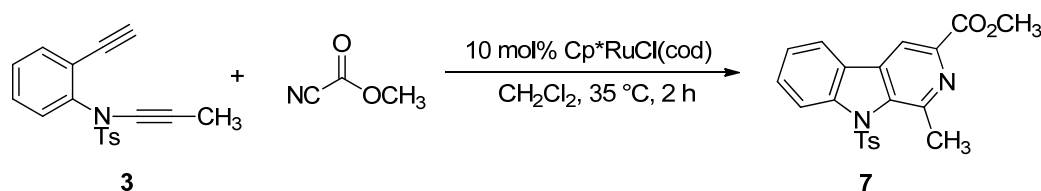

To a solution of Cp<sup>\*</sup>RuCl(cod) (9.8 mg, 0.026 mmol, 10 mol%) in dry with nitrogen purged CH<sub>2</sub>Cl<sub>2</sub> (1 mL) was added methylcyanoformate (0.4  $\mu$ L, 0.05 mmol, 2 equiv.). To the resulting mixture was added a solution of diyne **3** (80 mg, 0.26 mmol) in CH<sub>2</sub>Cl<sub>2</sub> (10 mL) during 1-2 h via syringe-pump at 35 °C. After completion of the addition the reaction mixture was stirred additional 30 min (monitored by TLC). Thereafter the solvent was removed under reduced pressure and the resulting residue was purified by flash chromatography (2:1 diethyl ether/pentane) to afford  $\beta$ -carboline **7** (94 mg, 0.24 mmol, 92% yield) as a colourless solid.

**Method B:**

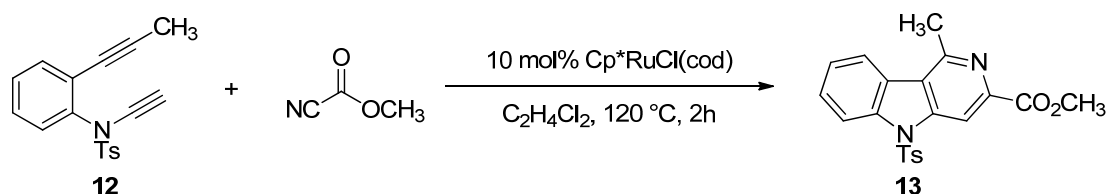

In a Schlenk tube were introduced Cp<sup>\*</sup>RuCl(cod) (9.8 mg, 0.026 mmol, 10 mol%), methylcyanoformate (200  $\mu$ L, 2.50 mmol) and dry dichloroethane (20 mL) and the resulting solution was purged with nitrogen. A solution of diyne **12** (80 mg, 0.26 mmol) in dichloroethane (4 mL) was added and the reaction mixture was heated at 120 °C for 1.5 h (monitored by TLC). Thereafter, the solvent was removed by evaporation under reduced pressure and the resulting residue was purified by flash chromatography (1:1 petroleum ether/ethyl acetate) to afford  $\gamma$ -carboline **13** (46 mg, 0.12 mmol, 46% yield) as a colourless solid.

**Method C:**

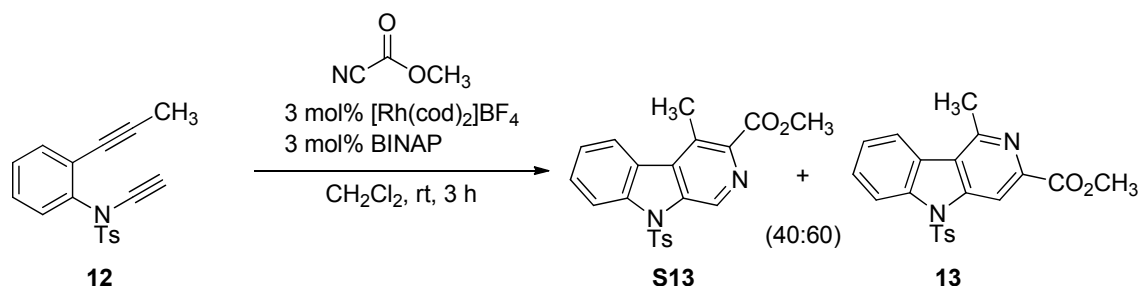

In a Schlenk tube were dissolved [Rh(cod)<sub>2</sub>]<sup>+</sup>BF<sub>4</sub><sup>-</sup> (2.6 mg, 3 mol%) and BINAP (4.2 mg, 3 mol%) in dry CH<sub>2</sub>Cl<sub>2</sub> (1.0 mL) and the mixture was stirred for 5 min. Hydrogen gas was introduced to the resulting solution under ambient pressure and the reaction mixture was stirred for 20 min at room temperature. Thereafter, the solution was concentrated to dryness in vacuum. The residue was dissolved in CH<sub>2</sub>Cl<sub>2</sub> (1.2 mL) and methylcyanoformate (175  $\mu$ L, 2.2 mmol) and a solution of diyne **12** (68 mg, 0.22 mmol) in CH<sub>2</sub>Cl<sub>2</sub> (1.0 mL) was added. The mixture was stirred at room temperature for 3 h (monitored by TLC). Thereafter, the solvent was removed by evaporation under reduced pressure and the resulting residue was purified by flash chromatography (4:1 petroleum

ether/ethyl acetate) to furnish  $\beta$ -carboline **S13** (29 mg, 0.07 mmol, 33% yield) and  $\gamma$ -carboline **13** (43 mg, 0.11 mmol, 50% yield) as colourless solids.

**1-Methyl-9-(toluene-4-sulfonyl)-9H- $\beta$ -carboline-3-carboxylic acid methyl ester (7)**

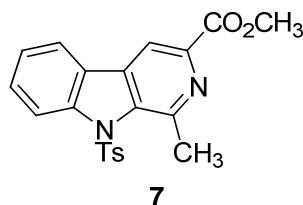

Following **Method A**  $\beta$ -carboline **7** (94 mg, 0.24 mmol, 92% yield) was obtained after flash chromatography (1:1 petroleum ether/ethyl acetate) as a colourless solid;  $R_f$  0.27 (1:2 petroleum ether/diethyl ether), mp 183-184 °C (pentane/ $\text{CH}_2\text{Cl}_2$ ).

$^1\text{H}$  NMR (400 MHz,  $\text{CDCl}_3$ )  $\delta$  2.21 (s, 3H), 3.14 (s, 3H), 4.05 (s, 3H), 6.91 (d,  $J = 8.2$  Hz, 2H), 7.13 (d,  $J = 8.2$  Hz, 2H), 7.41 (t,  $J = 7.4$  Hz, 1H), 7.61 (t,  $J = 7.6$  Hz, 1H), 7.81 (d,  $J = 7.6$  Hz, 1H), 8.30 (d,  $J = 8.4$  Hz, 1H), 8.36 (s, 1H);  $^{13}\text{C}$  NMR (100 MHz,  $\text{CDCl}_3$ )  $\delta =$  165.6 (s), 150.7 (s), 145.0 (s), 143.0 (s), 142.2 (s), 138.0 (s), 137.8 (s), 132.6 (s), 130.1 (d), 129.1 (d), 126.6 (d), 126.5 (s), 125.9 (d), 121.2 (d), 119.2 (d), 114.1 (d), 53.0 (q), 26.0 (q), 21.4 (q); IR (KBr):  $\tilde{\nu}_{\text{max}}/\text{cm}^{-1} =$  2948, 1746, 1614, 1594, 1573, 1171, 686. MS [ESI (+)]:  $m/z =$  417  $[\text{M}+\text{Na}]^+$ ; HRMS [ESI (+)]: Mass calcd for  $\text{C}_{21}\text{H}_{19}\text{N}_2\text{O}_4\text{S}$   $[\text{M}+\text{H}]^+$ , 395.1065; found, 395.1072. Anal calcd for  $\text{C}_{21}\text{H}_{18}\text{N}_2\text{O}_4\text{S}$  (394.44 g  $\text{mol}^{-1}$ ): C, 63.94; H, 4.60; N, 7.10; Found C, 63.89; H, 4.59; N, 7.05.

**1-Methyl-5-(toluene-4-sulfonyl)-5H-pyrido[4,3-*b*]indole-3-carboxylic acid methyl ester (13)**

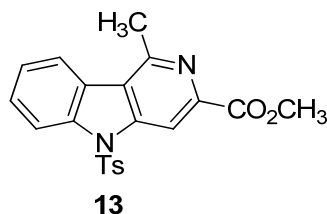

Following **Method B**  $\gamma$ -carboline **13** (46 mg, 0.11 mmol, 46% yield) was obtained after flash chromatography (4:1 petroleum ether/ethyl acetate) as a colourless solid;  $R_f$  0.06 (4:1 petroleum ether/ethyl acetate), mp 246-247 °C (pentane/ $\text{CH}_2\text{Cl}_2$ ).

$^1\text{H}$  NMR (300 MHz,  $\text{CDCl}_3$ )  $\delta$  2.29 (s, 3H), 3.06 (s, 3H), 4.08 (s, 3H), 7.17 (d,  $J = 8.3$  Hz, 2H), 7.48 (t,  $J = 7.5$  Hz, 1H), 7.62 (t,  $J = 7.6$  Hz, 1H), 7.77 (d,  $J = 8.3$  Hz, 2H), 8.10 (d,  $J = 7.8$  Hz, 1H), 8.41 (d,  $J = 8.4$  Hz, 1H), 8.97 (s, 1H);  $^{13}\text{C}$  NMR (100 MHz,  $\text{CDCl}_3$ )  $\delta$  166.1 (s), 153.9 (s), 145.9 (s), 144.5 (s), 143.8 (s), 139.1 (s), 134.7 (s), 130.2 (d), 128.8 (s), 126.8 (d), 124.9 (d), 124.1 (s), 123.2 (d), 122.8 (d), 114.9 (d), 109.9 (d), 53.2 (q), 24.5 (q), 21.7 (q); IR (neat):  $\tilde{\nu}/\text{cm}^{-1} =$  1735, 1574, 1428, 1370, 1328, 1219, 1171, 939. MS [ESI (+)]:  $m/z =$  417  $[\text{M}+\text{Na}]^+$ . Anal calcd for  $\text{C}_{21}\text{H}_{18}\text{N}_2\text{O}_4\text{S}$  (394.10 g  $\text{mol}^{-1}$ ): C, 63.94; H, 4.60; N, 7.10; Found: C, 63.85; H, 4.49; N, 7.09.

#### 4-Methyl-9-(toluene-4-sulfonyl)-9H- $\beta$ -carboline-3-carboxylic acid methyl ester (S13)

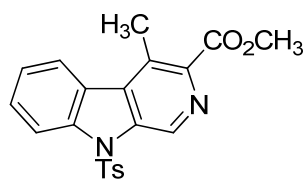

**S13**

Following **Method C** the carbolines **13** and **S13** were obtained in a ratio of 40:60 (83% yield). The regioisomers were separated by flash chromatography (4:1 petroleum ether/ethyl acetate).  $\beta$ -carboline **S13** was obtained as a solid,  $R_f$  0.12 (SiO<sub>2</sub>, petroleum ether/ethyl acetate = 4:1 (v/v)), mp 195-197 °C (petroleum ether/CH<sub>2</sub>Cl<sub>2</sub>).

<sup>1</sup>H NMR (400 MHz, CDCl<sub>3</sub>)  $\delta$  9.59 (s, 1H), 8.46 (d,  $J$  = 8.7 Hz, 1H), 8.20 (d,  $J$  = 7.2 Hz, 1H), 7.74 (d,  $J$  = 8.5 Hz, 2H), 7.66-7.70 (m, 1H), 7.45-7.50 (m, 1H), 7.14 (d,  $J$  = 8.5 Hz, 2H), 4.04 (s, 3H), 3.02 (s, 3H), 2.28 (s, 3H); <sup>13</sup>C NMR (100 MHz, CDCl<sub>3</sub>)  $\delta$  = 167.0 (s), 145.9 (s), 142.2 (s), 139.2 (s), 135.3 (s), 134.4 (s), 134.2 (s), 132.3 (s), 130.4 (s), 130.1 (d), 129.7 (d), 126.7 (d), 125.0 (s), 124.7 (d), 124.3 (d), 115.2 (d), 52.9 (q), 21.7 (q), 16.4 (q); IR (neat):  $\tilde{\nu}$ /cm<sup>-1</sup> = 2950, 1716, 1594, 1436, 1370, 1308, 1296, 1251, 1228, 1172, 1071, 936. FD-MS:  $m/z$  (%) = 394 (100) [M<sup>+</sup>]. HRMS [ESI (+)]: Mass calcd for C<sub>21</sub>H<sub>18</sub>N<sub>2</sub>NaO<sub>4</sub>S [M+Na]<sup>+</sup>, 417.0879; found 417.0858.

#### 1-Phenyl-9-(toluene-4-sulfonyl)-9H- $\beta$ -carboline-3-carboxylic acid methyl ester (**8a**)

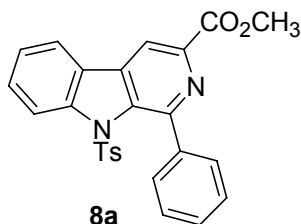

**8a**

Following **Method A**  $\beta$ -carboline **8a** (59 mg, 0.13 mmol, 61% yield) was obtained after flash chromatography (3:1 petroleum ether/ethyl acetate) as a colourless solid;  $R_f$  0.29 (1:2 petroleum ether/diethyl ether), mp 212-213 °C (pentane/CH<sub>2</sub>Cl<sub>2</sub>). **Method C** provided a mixture of  $\beta$ -(**8a**) and  $\gamma$ -carboline in a ratio of 92:8 (95% yield) from which isomeric pure  $\beta$ -carboline **8a** was obtained after flash chromatography.

<sup>1</sup>H NMR (400 MHz, CDCl<sub>3</sub>):  $\delta$  2.18 (s, 3H), 4.04 (s, 3H), 6.84 (d,  $J$  = 8.4 Hz, 2H), 6.97 (d,  $J$  = 8.4 Hz, 2H), 7.37-7.56 (m, 4H), 7.61 (dt,  $J$  = 7.9 Hz,  $J$  = 1.2 Hz, 1H), 7.84 (d,  $J$  = 7.9 Hz, 2H), 8.08-8.15 (m, 2H), 8.28 (d,  $J$  = 8.4 Hz, 2H), 8.42 (s, 1H); <sup>13</sup>C NMR (100 MHz, CDCl<sub>3</sub>):  $\delta$  165.8 (s), 151.2 (s), 144.8 (s), 143.8 (s), 142.4 (s), 140.3 (s), 139.2 (s), 136.6 (s), 132.0 (s), 130.2 (d), 128.9 (d), 128.7 (d), 128.3 (d), 126.8 (s), 126.7 (d), 126.0 (d), 121.4 (d), 119.4 (d), 114.5 (d), 53.0 (q), 21.4 (q); IR (neat):  $\tilde{\nu}$ /cm<sup>-1</sup> = 2952, 2925, 1714, 1614, 1593, 1564, 1378, 1359, 1275, 1240, 1173, 1149, 933. MS:  $m/z$  (%) = 456 (100) [M<sup>+</sup>]. HRMS: Mass calcd for C<sub>26</sub>H<sub>21</sub>N<sub>2</sub>O<sub>4</sub>S [(M+H)]<sup>+</sup>, 457.1222; found 457.1222.

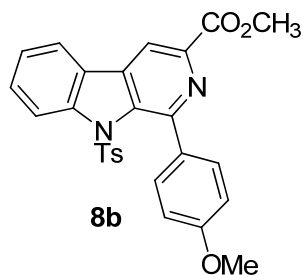

**8b**

Following **Method B**  $\beta$ -carboline **8b** (60 mg, 0.12 mmol, 60% yield) was obtained after flash chromatography (8:2 pentane/ethyl acetate) as a colourless solid;  $R_f$  0.16 (8:2 pentane/diethyl ether).

$^1\text{H}$  NMR (400 MHz,  $\text{CDCl}_3$ )  $\delta$  8.34 (s, 1H), 8.27 (d,  $J = 4.3$  Hz, 1H), 8.12 (d,  $J = 8.8$  Hz, 2H), 7.81 (d,  $J = 7.7$  Hz, 1H), 7.59 (dd,  $J = 7.3$  Hz,  $J = 3.9$  Hz, 1H), 7.41 (dd,  $J = 7.3$  Hz,  $J = 3.9$  Hz, 1H), 7.04 (d,  $J = 8.8$  Hz, 2H), 6.96 (d,  $J = 8.36$  Hz, 2H), 6.83 (d,  $J = 8.20$  Hz, 2H), 4.04 (s, 3H), 3.89 (s, 3H), 2.18 (s, 3H);  $^{13}\text{C}$  NMR (100 MHz,  $\text{CDCl}_3$ )  $\delta$  165.9 (s), 160.5 (s), 151.1 (s), 144.9 (s), 143.9 (s), 142.5 (s), 139.4 (s), 136.4 (s), 132.9 (s), 131.9 (s), 130.1 (d), 130.2 (s), 129.0 (d), 127.1 (s), 126.8 (d), 126.1 (d), 121.4 (d), 119.6 (d), 114.0 (d), 113.8 (d), 55.3 (q), 53.0 (q), 21.5 (q); HRMS [ESI (+)]: Mass clacd for  $\text{C}_{27}\text{H}_{23}\text{N}_2\text{O}_5\text{S}$  (M+H), 487.1328; found, 487.1311.

#### 1-Pyridin-3-yl-9-(toluene-4-sulfonyl)-9H- $\beta$ -carboline-3-carboxylic acid methyl ester (**8d**)

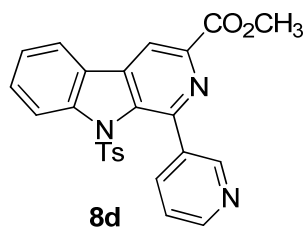

Following **Method A**  $\beta$ -carboline **8d** (37 mg, 0.08 mmol, 70% yield) was obtained after flash chromatography (1:2 petroleum ether/ethyl acetate) as a solid;  $R_f$  0.39 (ethyl acetate), mp 210-215  $^\circ\text{C}$  (pentane/ $\text{CH}_2\text{Cl}_2$ ).

$^1\text{H}$  NMR (400 MHz,  $\text{CDCl}_3$ )  $\delta$  2.20 (s, 3H), 4.06 (s, 3H), 6.86 (d,  $J = 8.2$  Hz, 2H), 6.96 (d,  $J = 8.2$  Hz, 2H), 7.43-7.50 (m, 2H), 7.66 (dt,  $J = 7.8$  Hz,  $J = 1.2$  Hz, 1H), 7.87 (d,  $J = 7.5$  Hz, 1H), 8.31 (d,  $J = 8.2$  Hz, 1H), 8.41 (dt,  $J = 7.9$  Hz,  $J = 1.9$  Hz, 1H), 8.48 (s, 1H), 8.66 (dd,  $J = 4.9$  Hz,  $J = 1.5$  Hz, 1H), 9.27 (d,  $J = 1.9$  Hz, 1H);  $^{13}\text{C}$  NMR (100 MHz,  $\text{CDCl}_3$ )  $\delta$  165.5 (s), 149.7 (d), 149.6 (d), 148.2 (s), 145.2 (s), 144.0 (s), 142.3 (s), 139.5 (s), 136.8 (s), 136.3 (s), 135.9 (d), 131.7 (s), 130.6 (d), 129.1 (d), 126.7 (d), 126.6 (d), 126.3 (d), 123.2 (s), 121.5 (d), 119.5 (d), 115.2 (d), 53.1 (q), 21.5 (q); IR (neat):  $\tilde{\nu}/\text{cm}^{-1} = 2957, 2899, 2836, 2232, 2161, 1620, 1595, 1482, 1373, 1229, 1172, 1081, 1028, 920$ . FD-MS:  $m/z$  (%) = 457 (100) [ $\text{M}^+$ ]; Anal calcd for  $\text{C}_{25}\text{H}_{19}\text{N}_3\text{O}_4\text{S}$  (457.50  $\text{g mol}^{-1}$ ): C, 65.63; H, 4.19; N, 9.18; Found: C, 65.59; H, 4.22; N, 9.06.

#### 9-(Toluene-4-sulfonyl)-9H- $\beta$ -carboline-3-carboxylic acid methyl ester (**10**) and 5-(Toluene-4-sulfonyl)-5H- $\gamma$ -carboline-3-carboxylic acid methyl ester (**S10**)

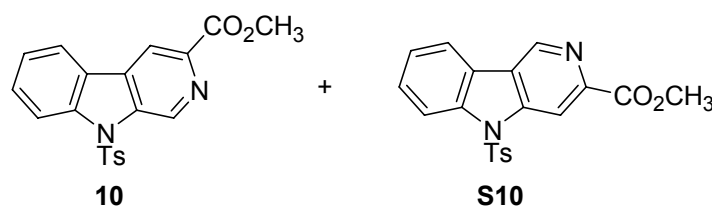

Following **Method A** the carbolines **10** and **S10** were obtained in a ratio of 30:70 (72 mg, 0.19 mmol, 70% yield). The regioisomers **10** and **S10** were separated by flash chromatography (1:1 petroleum ether/ethyl acetate). Following **Method C** the carbolines **10** and **S10** were obtained in a ratio of 40:60 (38 mg, 0.10 mmol, 40% yield).

$\beta$ -carboline **10** was obtained as a solid,  $R_f$  0.29 (1:1 petroleum ether/ethyl acetate), mp 166-167  $^\circ\text{C}$  (pentane/ $\text{CH}_2\text{Cl}_2$ ).

$^1\text{H}$  NMR (400 MHz,  $\text{CDCl}_3$ )  $\delta$  9.71 (s, 1H), 8.71 (s, 1H), 8.40 (d,  $J = 8.5$  Hz, 1H), 8.06 (d,  $J = 8.06$  Hz, 1H), 7.75 (d,  $J = 8.2$  Hz, 2H), 7.67-7.72 (m, 1H), 7.45-7.50 (m, 1H), 7.15 (d,  $J = 8.2$  Hz, 2H), 4.06 (s, 3H), 2.29 (s, 3H);  $^{13}\text{C}$  NMR (100 MHz,  $\text{CDCl}_3$ )  $\delta$  164.9 (s), 146.0 (s), 142.3 (s), 139.6 (s), 137.0 (d), 136.5 (s), 134.6 (s), 133.3 (s), 130.8 (d), 130.2 (d), 126.8 (d), 124.9 (d), 124.1 (s), 122.0 (d), 117.1 (d), 115.4 (d), 53.1 (q), 21.7 (q); IR (neat):  $\tilde{\nu}/\text{cm}^{-1} = 3066, 3013, 2946, 1716, 1622, 1595, 1437, 1289, 1173$ . FD-MS:  $m/z$  (%) = 380 (100) [ $\text{M}^+$ ].

$\gamma$ -carboline **S10** was obtained as a solid,  $R_f$  0.12 (1:1 petroleum ether/ethyl acetate), mp 206-207 °C (pentane/CH<sub>2</sub>Cl<sub>2</sub>).

<sup>1</sup>H NMR (400 MHz, CDCl<sub>3</sub>)  $\delta$  9.28 (s, 1H), 9.04 (s, 1H), 8.34 (d,  $J$  = 8.6 Hz, 1H), 8.07 (d,  $J$  = 7.7 Hz, 1H), 7.78 (d,  $J$  = 8.4 Hz, 2H), 7.62 (m, 1H), 7.46 (m, 1H), 7.17 (d,  $J$  = 8.4 Hz, 2H), 4.08 (s, 3H), 2.29 (s, 3H); <sup>13</sup>C NMR (100 MHz, CDCl<sub>3</sub>)  $\delta$  165.9 (s), 146.0 (s), 145.6 (s), 143.8 (s), 142.6 (d), 139.3 (s), 134.7 (s), 130.2 (d), 129.6 (d), 126.8 (d), 125.0 (d), 124.7 (s), 123.2 (s), 121.3 (d), 115.1 (d), 111.7 (d), 53.2 (q), 21.7 (q); IR (neat):  $\tilde{\nu}/\text{cm}^{-1}$  = 2948, 1719, 1589, 1457, 1433, 1294, 1170, 971. MS:  $m/z$  (%) = 380 (100) [M<sup>+</sup>]. Anal calcd for C<sub>20</sub>H<sub>16</sub>N<sub>2</sub>O<sub>4</sub>S (380.08 g mol<sup>-1</sup>): C, 63.14; H, 4.24; N, 7.36; Found, C, 63.08; H, 4.30; N, 7.22.

**1,4-Dimethyl-9-(toluene-4-sulfonyl)-9H- $\beta$ -carboline-3-carboxylic acid methyl ester (11) and**  
**1,4-Dimethyl-5-(toluene-4-sulfonyl)-5H- $\gamma$ -carboline-3-carboxylic acid methyl ester (S11)**

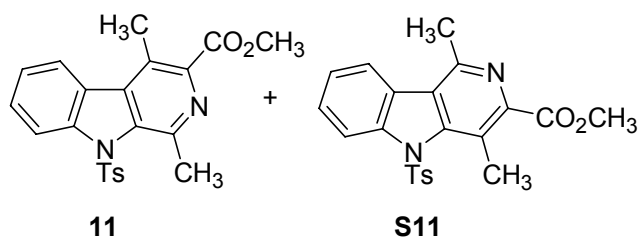

Following **Method B** the carbolines **11** and **S11** were obtained in a ratio of 50:50 (69 mg, 0.17 mmol, 87% yield). The regioisomers **11** and **S11** were separated by flash chromatography (2:1 petroleum ether/ethyl acetate).  $\beta$ -carboline **11** was obtained as a solid,  $R_f$  0.26 (2:1 petroleum ether/ethyl acetate), mp 166-167 °C (pentane/CH<sub>2</sub>Cl<sub>2</sub>).

<sup>1</sup>H NMR (400 MHz, CDCl<sub>3</sub>)  $\delta$  8.30 (d,  $J$  = 8.4 Hz, 1H), 7.96 (d,  $J$  = 8.0 Hz, 1H), 7.54-7.61 (m, 1H), 7.36-7.43 (m, 1H), 7.09 (d,  $J$  = 8.4 Hz, 2H), 6.91 (d,  $J$  = 8.4 Hz, 2H), 4.03 (s, 3H), 3.07 (s, 3H), 2.81 (s, 3H), 2.22 (s, 3H); <sup>13</sup>C NMR (100 MHz, CDCl<sub>3</sub>)  $\delta$  167.2 (s), 147.9 (s), 145.0 (s), 142.2 (s), 137.1 (s), 137.0 (s), 132.6 (s), 129.3 (d), 129.2 (d), 127.9 (s), 126.9 (d), 126.1 (s), 125.9 (d), 123.8 (d), 119.4 (d), 53.0 (q), 25.7 (q), 21.6 (q), 15.8 (q); IR (neat):  $\tilde{\nu}/\text{cm}^{-1}$  = 2950, 2930, 1727, 1596, 1573, 1439, 1422, 1372, 1172, 1140. MS:  $m/z$  (%) = 409 (100) [M+H]<sup>+</sup>. Anal calcd for C<sub>22</sub>H<sub>20</sub>N<sub>2</sub>O<sub>4</sub>S (408.11 g mol<sup>-1</sup>): C, 64.69; H, 4.94; N, 6.86; Found, C, 64.54; H, 4.93; N, 6.84.

$\gamma$ -carboline **S11** was obtained as a solid,  $R_f$  0.10 (1:2 pentane/diethyl ether), mp 167-168 °C (pentane/CH<sub>2</sub>Cl<sub>2</sub>).

<sup>1</sup>H NMR (400 MHz, CDCl<sub>3</sub>)  $\delta$  8.25 (d,  $J$  = 8.3 Hz, 1H), 7.82 (d,  $J$  = 7.8 Hz, 1H), 7.48-7.54 (m, 1H), 7.36-7.23 (m, 1H), 7.07 (d,  $J$  = 8.3 Hz, 2H), 6.90 (d,  $J$  = 8.3 Hz, 2H), 4.04 (s, 3H), 2.91 (s, 3H), 2.87 (s, 3H), 2.22 (s, 3H); <sup>13</sup>C NMR (100 MHz, CDCl<sub>3</sub>)  $\delta$  167.2 (s), 150.1 (s), 147.7 (s), 147.1 (s), 145.0 (s), 142.1 (s), 132.6 (s), 129.1 (d), 128.2 (d), 127.2 (s), 126.9 (d), 126.4 (s), 126.1 (d), 124.6 (s), 122.7 (d), 119.3 (d), 53.0 (q), 23.7 (q), 21.6 (q), 18.9 (q); IR (neat):  $\tilde{\nu}/\text{cm}^{-1}$  = 2949, 2925, 1739, 1721, 1597, 1565, 1438, 1366, 1323, 1173, 1059. MS:  $m/z$  (%) = 409 (100) [M+H]<sup>+</sup>. Anal calcd for C<sub>22</sub>H<sub>20</sub>N<sub>2</sub>O<sub>4</sub>S (408.11 g mol<sup>-1</sup>): C, 64.69; H, 4.94; N, 6.86; Found, C, 64.63; H, 5.02; N, 6.75.

**1-Pentyl-5-(toluene-4-sulfonyl)-5H- $\gamma$ -carboline-3-carboxylic acid methyl ester (15)**

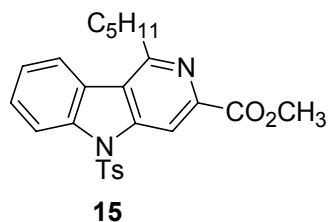

Following **Method B**  $\gamma$ -carboline **15** (32 mg, 0.07 mmol, 52% yield) was obtained after flash chromatography (3:1 petroleum ether/ethyl acetate) as a solid;  $R_f$  0.13 (2:1 pentane/diethyl ether), mp 167-169 °C (pentane/CH<sub>2</sub>Cl<sub>2</sub>).

<sup>1</sup>H NMR (600 MHz, CDCl<sub>3</sub>):  $\delta$  8.96 (s, 1H), 8.43 (d,  $J$  = 8.6 Hz, 1H), 8.04 (d,  $J$  = 7.9 Hz, 1H), 7.79 (d,  $J$  = 8.5 Hz, 2H), 7.62 (dt,  $J$  = 7.9 Hz,  $J$  = 1.2 Hz, 1H), 7.50 (dt,  $J$  = 7.5 Hz,  $J$  = 0.9 Hz, 1H), 7.18 (d,  $J$  = 8.3 Hz, 2H), 4.08 (s, 3H), 3.35 (m, 2H), 2.31 (s, 3H), 1.80-1.86 (m, 2H), 1.51 (m, 2H), 1.39 (m, 2H), 0.91 (t,  $J$  = 7.4 Hz, 3H); <sup>13</sup>C NMR (100 MHz, CDCl<sub>3</sub>)  $\delta$  166.1 (s), 158.1 (s), 145.8 (s), 144.6 (s), 144.1 (s), 139.0 (s), 134.6 (s), 130.0 (d), 128.6 (d), 126.7 (d), 124.8 (d), 123.6 (s), 123.0 (d), 122.0 (s), 114.8 (d), 109.7 (d), 53.08 (q), 37.4 (t), 32.1 (t), 28.1 (t), 22.6 (t), 21.6 (q), 14.0 (q); IR (KBr):  $\tilde{\nu}$ /cm<sup>-1</sup> = 2951, 2924, 1714, 1372, 1333, 1176. MS [ESI (+)]:  $m/z$  = 473 [M+Na]<sup>+</sup>, 923 [2 M+Na]<sup>+</sup>. HRMS (ESI (+)): Mass calcd for C<sub>25</sub>H<sub>26</sub>N<sub>2</sub>O<sub>4</sub>SNa [M+Na]<sup>+</sup>, 473.1511; found, 473.1507.

### 1-Phenyl-5-(toluene-4-sulfonyl)-5H- $\gamma$ -carboline-3-carboxylic acid methyl ester (**17**)

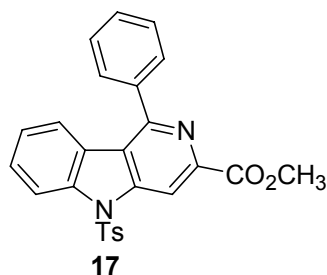

Following **Method B**  $\gamma$ -carboline **17** (61 mg, 0.13 mmol, 67% yield) was obtained after flash chromatography (4:1 petroleum ether/ethyl acetate) as a solid;  $R_f$  0.14 (2:1 pentane/diethyl ether), mp 198-199 °C (pentane/CHCl<sub>3</sub>).

<sup>1</sup>H NMR (400 MHz, CDCl<sub>3</sub>)  $\delta$  9.1 (s, 1H), 8.38 (d,  $J$  = 8.4 Hz, 1H), 7.84 (d,  $J$  = 8.4 Hz, 2H), 7.64-7.68 (m, 2H), 7.51-7.59 (m, 4H), 7.42 (d,  $J$  = 7.5 Hz, 1H), 7.17-7.23 (m, 3H), 4.07 (s, 3H), 2.32 (s, 3H); <sup>13</sup>C NMR (100 MHz, CDCl<sub>3</sub>)  $\delta$  166.0 (s), 155.2 (s), 145.9 (s), 144.9 (s), 144.4 (s), 139.1 (s), 139.0 (s), 134.6 (s), 130.1 (s), 129.3 (d), 129.0 (d), 128.7 (d), 126.7 (s), 124.2 (s), 123.4 (s), 123.0 (d), 122.1 (s), 114.5 (d), 110.1 (d), 53.1 (q), 21.6 (q); IR (KBr):  $\tilde{\nu}$ /cm<sup>-1</sup> = 2951, 1740, 1715, 1564, 1371, 1229, 1174, 752, 667. MS [ESI (+)]:  $m/z$  = 457 [M+H]<sup>+</sup>. Anal calcd for C<sub>26</sub>H<sub>20</sub>N<sub>2</sub>O<sub>4</sub>S (456.51 g mol<sup>-1</sup>): C, 68.41; H, 4.42; N, 6.14; Found: C, 68.31; H, 4.42; N, 6.03.

## II. Synthesis of the marine alkaloid eudistomin U (22)

### 2-Trimethylsilylanylethynyl-phenylamine (S18a)

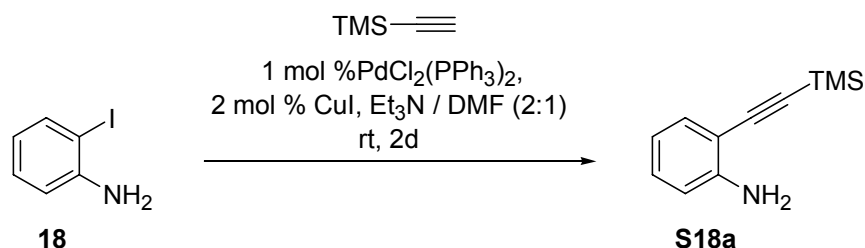

Into a flame dried Schlenk tube were introduced 2-iodoaniline (**18**) (5.90 g, 26.94 mmol), PdCl<sub>2</sub>(PPh<sub>3</sub>)<sub>2</sub> (188 mg, 0.27 mmol), CuI (102 mg, 0.54 mmol), dry Et<sub>3</sub>N (62.8 mL), dry DMF (27 mL), and trimethylsilylacetylene (5.20 mL, 35.02 mmol). The Schlenk tube was sealed with a screw cap and the resulting reaction mixture stirred at room temperature for 1 day. Thereafter, water and CH<sub>2</sub>Cl<sub>2</sub> were added and the product extracted with CH<sub>2</sub>Cl<sub>2</sub> and washed with brine. The combined organic layers were dried with MgSO<sub>4</sub> filtered and concentrated. Flash chromatography (9:1 cyclohexane/ethyl acetate) of the obtained residue afforded **S18a** (5.04 g, 26.67 mmol, 99% yield) as an oil, *R<sub>f</sub>* 0.43.

<sup>1</sup>H NMR (400 MHz, CDCl<sub>3</sub>) δ 7.29 (d, *J* = 8.3 Hz, 1H), 7.12 (dd, *J* = 6.6 Hz, *J* = 1.2 Hz, 2H), 6.67 (dd, *J* = 6.6 Hz, *J* = 1.2 Hz, 2H), 4.23 (bs, 2H), 0.28 (s, 9H); <sup>13</sup>C NMR (100 MHz, CDCl<sub>3</sub>) δ 148.4 (s), 132.4 (d), 130.0 (d), 117.9 (d), 114.3 (d), 108.0 (s), 102.0 (s), 99.9 (s), 0.3 (q); MS [ESI (+)]: *m/z* (%) = 190 (100, [M+H]<sup>+</sup>), 168 (10), 162 (20), 91 (80).

### 4-Methyl-*N*-(2-trimethylsilylanylethynyl-phenyl)-benzenesulfonamide (S18b):

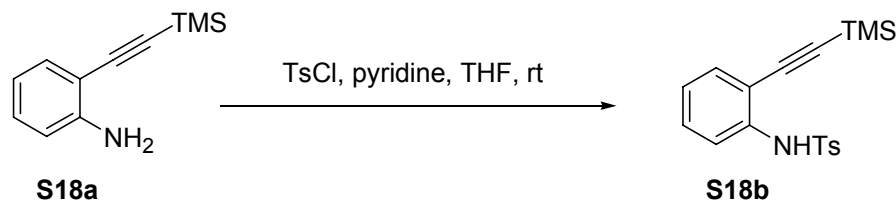

Into a round bottom flask were introduced aniline **S18a** (5.04 g, 26.60 mmol), tosylchloride (11.14 g, 58.60 mmol), and dry pyridine (88 mL). The resulting reaction mixture was stirred at room temperature until completion. Thereafter, water and CH<sub>2</sub>Cl<sub>2</sub> were added and the product was extracted with CH<sub>2</sub>Cl<sub>2</sub>. The combined layers were washed with brine, dried with MgSO<sub>4</sub>, filtered and concentrated. Flash chromatography (9:1 pentane/diethyl ether) afforded **S18b** (8.600 g, 25.07 mmol, 94% yield) as colourless solid; mp 81 °C pentane/CH<sub>2</sub>Cl<sub>2</sub>, *R<sub>f</sub>* 0.4.

<sup>1</sup>H NMR (400 MHz, CDCl<sub>3</sub>): δ 7.64 (d, *J* = 8.3 Hz, 2H), 7.36 (d, *J* = 8.3 Hz, 1H), 7.30-7.24 (m, 2H), 7.20 (s, 1H), 7.19 (d, *J* = 8.3 Hz, 2H), 7.00 (m, 1H), 2.36 (s, 3H), 0.27 (s, 9H); <sup>13</sup>C NMR (100 MHz, CDCl<sub>3</sub>) δ 144.1 (s), 138.2 (s), 136.2 (s), 132.1 (d), 129.9 (d), 129.7 (d), 127.4 (d), 124.4 (d), 119.8 (d), 114.3 (s), 102.4 (s), 99.6 (s), 21.6 (q), 0.0 (q); IR (neat):  $\tilde{\nu}$ /cm<sup>-1</sup> = 3258, 2959, 2158, 1488, 1450, 1400, 1339, 1246, 1170, 1095, 909; MS [ESI (+)]: *m/z* (%) = 366 (100, [M+Na]<sup>+</sup>). HRMS [ESI (+)]: Mass calcd for C<sub>18</sub>H<sub>21</sub>NNaO<sub>2</sub>SSi, 366.0960, found 366.0975; Anal. calcd for C<sub>18</sub>H<sub>21</sub>NO<sub>2</sub>SSi (343.52): C, 62.94; H, 6.16; N, 4.08. Found: C, 62.70, H, 6.06, N, 3.95.

***N*-Ethynyl-4-methyl-*N*-(2-trimethylsilanylethynyl-phenyl)-benzenesulfonamide (1)**

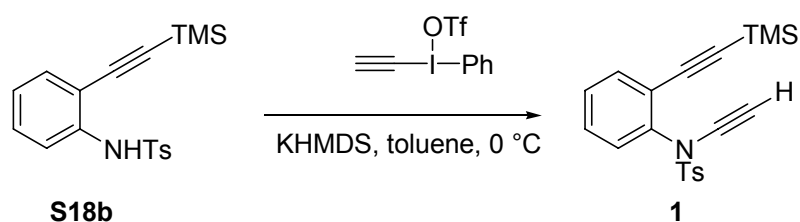

To a solution of **S18b** (715 mg, 2.08 mmol) in dry toluene (100 mL) was added KHMDS (5 mL of a 0.5 M solution in toluene) at 0 °C. After 30 min of stirring at 0 °C, a solution of ethynylphenyliodonium triflate (1.18 g, 3.12 mmol, 1.5 equiv.) in dry CH<sub>2</sub>Cl<sub>2</sub> (70 mL) was added. The reaction mixture was stirred at room temperature overnight. Concentration of the solution was followed by addition of CH<sub>2</sub>Cl<sub>2</sub> and water. The product was extracted with CH<sub>2</sub>Cl<sub>2</sub> and the combined organic layers were dried with MgSO<sub>4</sub>, filtrated and concentrated under reduced pressure. Purification of the obtained residue by flash chromatography (9:1 petroleum ether/diethyl ether) afforded **1** (648 mg, 85% yield) as a pale yellow solid, mp 92–93 °C (pentane/CHCl<sub>3</sub>).

<sup>1</sup>H NMR (400 MHz, CDCl<sub>3</sub>): δ 7.71 (d, *J* = 8.2 Hz, 2 H), 7.49 (m, 1 H), 7.33-7.26 (m, 5 H), 2.82 (s, 1 H), 2.45 (s, 3 H), 0.17 (s, 9 H). <sup>13</sup>C NMR (75 MHz, CDCl<sub>3</sub>): δ 144.8 (s), 138.7 (s), 134.7 (s), 133.9 (d), 129.6 (d), 129.1 (d), 129.0 (d), 128.9 (d), 128.5 (d), 123.0 (s), 101.5 (s), 99.8 (s), 75.6 (s), 58.9 (s), 21.7 (q), -0.3 (q).

IR (KBr):  $\tilde{\nu}_{\text{max}}/\text{cm}^{-1}$  = 3269, 2961, 2894, 2163, 2125, 1596, 1480, 1366, 1252, 1212, 1174, 1120, 1077, 1037, 929. MS (EI, 70 eV): *m/z* (%) = 367 (M<sup>+</sup>, 16), 352 (12), 302 (33), 288 (17), 212 (100), 197 (12), 184 (16), 182 (21), 91 (14). Anal calcd for C<sub>20</sub>H<sub>21</sub>NO<sub>2</sub>SSi (367.53 g mol<sup>-1</sup>): C, 65.36; H, 5.76; N, 3.81; Found: C, 65.21; H, 5.76; N, 3.86.

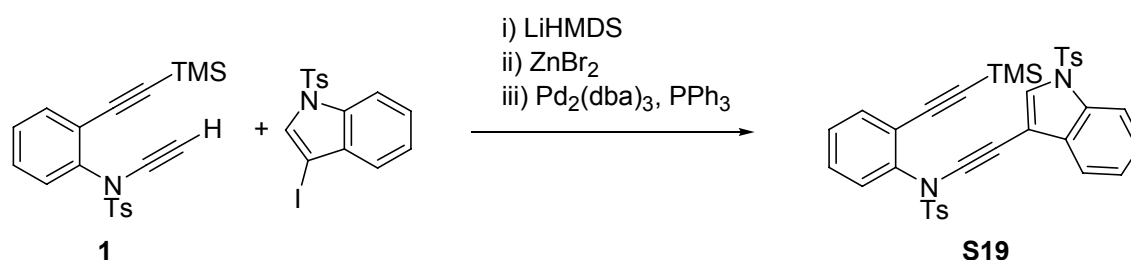

Freshly prepared LiHMDS (3.3 mL of a 0.5 M solution in THF) was added to a solution of **1** (400 mg, 1.09 mmol) in dry THF at □78 °C and stirred for 40 min at □40 °C. Thereafter, a solution of ZnBr<sub>2</sub> (270 mg, 1.20 mmol) in THF (0.8 mL) was added and the reaction mixture was stirred without cooling for 20 min and then transferred via canula to a solution of Pd<sub>2</sub>(dba)<sub>3</sub> (50 mg, 0.05 mmol), PPh<sub>3</sub> (55 mg, 0.21 mmol) and 3-iodo-1-tosylindole (519 mg, 1.30 mmol) in dry THF (10 mL). After stirring for 12 h at room temperature, water was added and the aqueous phase extracted with Et<sub>2</sub>O. The combined organic layers were washed with brine, dried with MgSO<sub>4</sub>, filtered and concentrated under reduced pressure. Purification of the obtained residue with flash chromatography (petroleum ether/ ethyl acetate) afforded **S19** (635 mg, 0.99 mmol, 92% yield) as a solid, *R<sub>f</sub>* 0.56 (2:1 petroleum ether/ethyl acetate), mp 61 °C.

<sup>1</sup>H NMR (400 MHz, CDCl<sub>3</sub>): δ 7.95 (d, *J* = 8.4 Hz, 1H), 7.76 (d, *J* = 7.1 Hz, 2H), 7.74 (d, *J* = 7.1 Hz, 2H), 7.63 (s, 1H), 7.53 (m, 2H), 7.29-7.36 (m, 6H), 7.18-7.27 (m, 3H), 2.46 (s, 3H), 2.32 (s, 3H), 0.10 (s, 9H); <sup>13</sup>C NMR (100 MHz, CDCl<sub>3</sub>) δ 145.7 (s), 145.3 (s), 139.7 (s), 135.4 (s), 135.2 (s), 134.7 (d), 131.6 (s), 130.4 (d), 130.2 (d), 129.7 (d), 129.5 (d), 129.4 (d), 129.0 (d), 128.8 (d), 127.4 (d), 125.8 (d), 124.0 (d), 123.5 (s), 121.3 (d), 114.0 (d), 105.5 (s), 101.9 (s), 100.5 (s), 86.6 (s), 62.0 (s), 22.2 (q), 22.1 (q), 0.2 (q); IR (KBr):  $\tilde{\nu}/\text{cm}^{-1}$  = 3065, 2959, 2361, 2242, 2161, 1711, 1597, 1483, 1447, 1374, 1174, 1129, 1089, 860. MS: *m/z* (%) = 636 (100, M<sup>+</sup>).



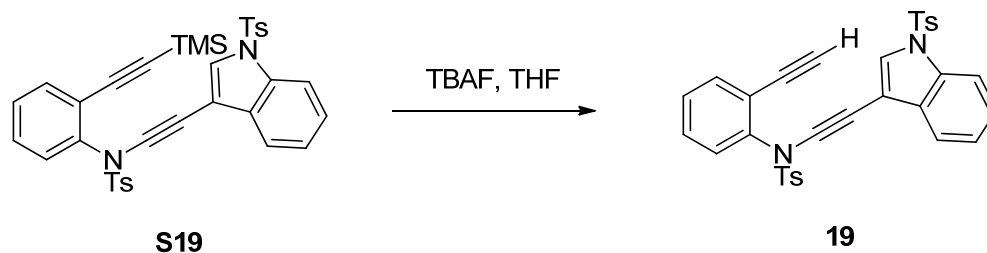

TBAF (1.3 mL of 1 M solution in THF) was added to a solution of **S19** (639 mg, 0.99 mmol) in THF (50 mL) at 0 °C. After 20 min, the reaction mixture was quenched by the addition of diethyl ether and water. The aqueous phase was extracted with diethyl ether. The combined organic layers were washed with brine, dried with MgSO<sub>4</sub> and concentrated under reduced pressure. The obtained residue was purified by flash chromatography (3:1 heptane/diethyl ether) to afford yne-ynamide **19** (474 mg, 0.84 mmol, 85% yield) as a colourless solid; *R<sub>f</sub>* 0.38 (2:1 heptane/ethyl acetate), mp 80-82 °C (pentane/CH<sub>2</sub>Cl<sub>2</sub>).

<sup>1</sup>H NMR (400 MHz, CDCl<sub>3</sub>): δ 7.95 (d, *J* = 8.4 Hz, 1H), 7.76 (d, *J* = 8.4 Hz, 4H), 7.68 (s, 1H), 7.50-7.56 (m, 2H), 7.30-7.41 (m, 6H), 7.18-7.27 (m, 3H), 3.06 (s, 1H), 2.46 (s, 3H), 2.32 (s, 3H); <sup>13</sup>C NMR (100 MHz, CDCl<sub>3</sub>) δ 145.3 (s), 145.1 (s), 139.7 (s), 134.8 (s), 134.3 (d), 134.1 (s), 131.2 (s), 130.0 (d), 129.70 (d), 129.65 (d), 129.2 (d), 129.1 (d), 128.6 (d), 126.9 (d), 125.4 (d), 123.6 (d), 122.1 (s), 120.6 (d), 113.5 (d), 104.6 (s), 86.0 (s), 83.2 (d), 78.9 (s), 61.3 (s), 21.7 (q), 21.6 (q); IR (KBr):  $\tilde{\nu}/\text{cm}^{-1}$  = 3276, 2242, 1596, 1483, 1447, 1374, 1189, 1174, 1130, 1088, 959. MS: *m/z* (%) = 564.1 (100) [M<sup>+</sup>]; HRMS [ESI (+)]: Mass calcd for C<sub>32</sub>H<sub>25</sub>N<sub>2</sub>O<sub>4</sub>S<sub>2</sub> (M+H<sup>+</sup>), 565.1256, found, 565.1252.

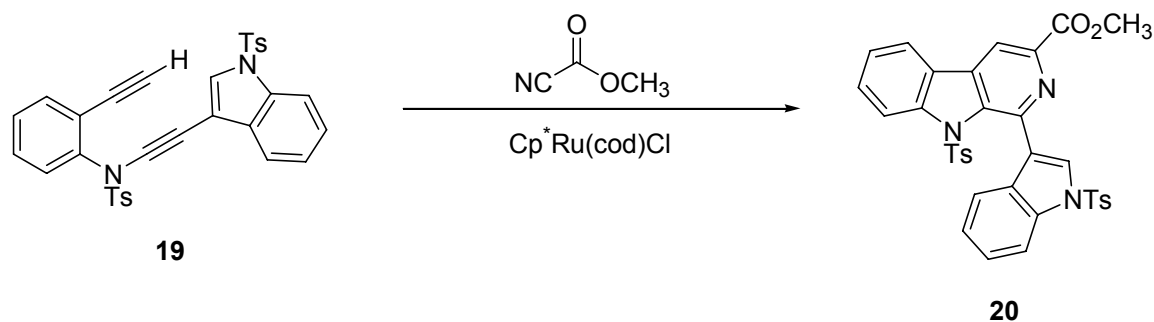

To a solution of Cp<sup>\*</sup>RuCl(cod) (9.8 mg, 0.026 mmol, 10 mol%) in dry CH<sub>2</sub>Cl<sub>2</sub> (1 mL) was added methyl cyanoforniate (410 μL, 0.52 mmol). Thereafter, a solution of yne-ynamide **19** (40 mg, 0.07 mmol) in CH<sub>2</sub>Cl<sub>2</sub> (10 mL) was added over a period of 1-2 h using a syringe-pump at 40 °C. The reaction was completed within 2 h (monitored by TLC). The solvent was removed by evaporation under reduced pressure and the resulting residue was purified by column chromatography (2:1 heptane/ethyl acetate) to provide β-carboline **20** (43 mg, 94%) as a solid; *R<sub>f</sub>* 0.26, mp 224-225 °C (pentane/CH<sub>2</sub>Cl<sub>2</sub>).

<sup>1</sup>H NMR (400 MHz, CDCl<sub>3</sub>): δ 8.40 (s, 1H), 8.39 (s, 1H), 8.29-8.36 (m, 2H), 7.98-8.04 (m, 1H), 7.93 (d, *J* = 8.4 Hz, 2H), 7.84 (d, *J* = 7.6 Hz, 1H), 7.65 (t, *J* = 7.6 Hz, 1H), 7.44 (t, *J* = 7.6 Hz, 1H), 7.35-7.40 (m, 2H), 7.23 (d, *J* = 8.3 Hz, 2H), 6.92 (d, *J* = 8.3 Hz, 2H), 6.83 (d, *J* = 8.3 Hz, 2H), 4.05 (s, 3H), 2.30 (s, 3H), 2.19 (s, 3H); <sup>13</sup>C NMR (75 MHz, CDCl<sub>3</sub>) δ 165.9 (s), 145.3 (s), 145.14 (s), 145.09 (s), 143.9 (s), 142.7 (s), 139.4 (s), 137.1 (s), 135.2 (s), 135.0 (s), 131.9 (s), 130.4 (d), 130.0 (d), 129.5 (s), 129.1 (d), 127.9 (d), 127.5 (d), 127.1 (s), 126.8 (d), 126.3 (d), 124.9 (d), 124.1 (d), 122.2 (d), 121.5 (d), 121.3 (s), 119.9 (d), 114.4 (d), 113.4 (d), 53.1 (q), 21.64 (q), 21.60 (q); IR (KBr):  $\tilde{\nu}/\text{cm}^{-1}$  = 2954, 2924, 1708, 1615, 1596, 1575, 1371, 1176, 1268. MS: *m/z* (%) = 649.2 (100) [M<sup>+</sup>], 650.2 (39) [M<sup>+</sup>]. HRMS [ESI (+)]: Mass calcd for C<sub>35</sub>H<sub>28</sub>N<sub>3</sub>O<sub>6</sub>S<sub>2</sub> (M+H<sup>+</sup>), 650.1420, found, 650.1415. Anal. calcd for C<sub>35</sub>H<sub>27</sub>N<sub>3</sub>O<sub>6</sub>S<sub>2</sub> (649.74 g mol<sup>-1</sup>): C, 64.70; H, 4.19; N, 6.47; found, C, 64.39; H, 4.28; N, 6.46.

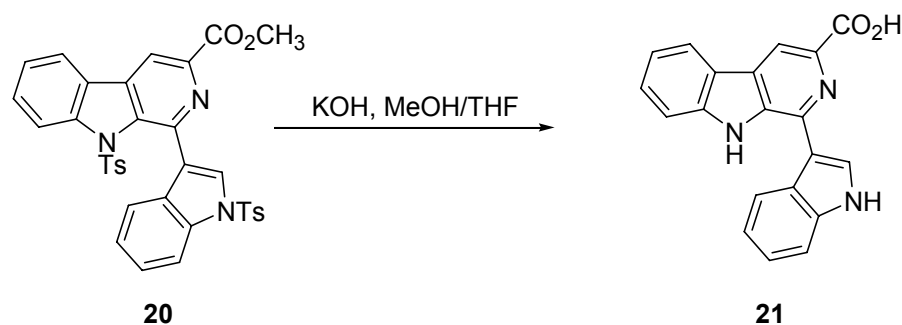

KOH (200 mg, 3.6 mmol) was added to a solution of **20** (233 mg, 0.36 mmol) in MeOH/THF (6 mL, 1:1.5 (v/v)) and the resulting mixture was stirred at 80 °C for 3 h. Thereafter the solvent was removed under reduced pressure and the obtained residue was taken up in water. The aqueous phase was washed with CH<sub>2</sub>Cl<sub>2</sub> and adjusted to pH 6 with conc. HCl. The resulting precipitate was isolated by filtration and dried under reduced pressure to give **21** (113 mg, 0.35 mmol, 96% yield) as a solid, mp 299-300 °C (dec).

<sup>1</sup>H NMR (400 MHz, DMSO-d<sub>6</sub>): δ 11.80 (s, 1H), 11.69 (s, 1H), 8.85 (d, *J* = 7.6 Hz, 1H), 8.76 (s, 1H), 8.43 (d, *J* = 2.5 Hz, 1H), 8.38 (d, *J* = 8.0 Hz, 1H), 7.75 (d, *J* = 8.0 Hz, 1H), 7.56-7.63 (m, 1H), 7.53 (d, *J* = 8.0 Hz, 1H), 7.29-7.35 (m, 1H), 7.21-7.27 (m, 1H), 7.15-7.21 (m, 2H); <sup>13</sup>C NMR (100 MHz, DMSO-d<sub>6</sub>) δ 167.4, 141.3, 139.7, 136.9, 136.6, 133.3, 128.5, 128.3, 126.7, 126.3, 122.9, 122.4, 121.8, 121.6, 120.4, 120.3, 114.3, 112.9, 112.6, 111.6; IR (neat):  $\tilde{\nu}/\text{cm}^{-1}$  = 3136, 1623, 1581, 1534, 1499, 1445, 13364, 1339, 1265, 1227, 1103, 1018, 733. MS: *m/z* (%) = 327 (100) [M<sup>+</sup>]; HRMS [ESI (+)]: Mass calcd for C<sub>20</sub>H<sub>13</sub>N<sub>3</sub>O<sub>2</sub>Na (M+Na), 350.0905, found, 350.0901.

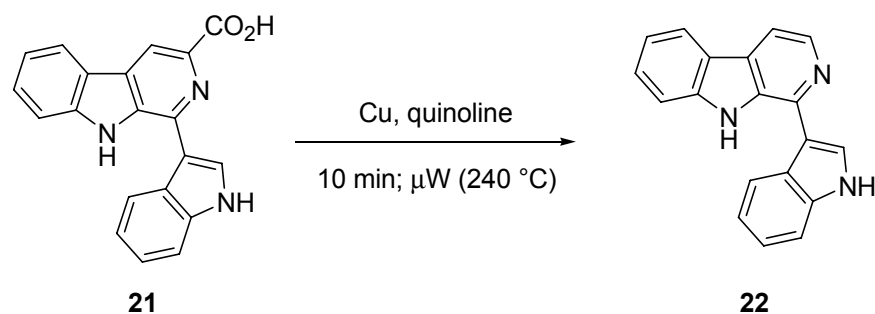

A solution of **21** (26 mg, 0.08 mmol) in quinoline (5 mL) containing copper powder (1.5 mg) was sealed under nitrogen in a reaction vial and irradiated in a microwave reactor for 10 min at 240 °C. Thereafter, the solvent was removed under reduced pressure and the obtained residue purified by column chromatography (Al<sub>2</sub>O<sub>3</sub>, 1:1 petroleum ether/ethyl acetate) to afford eudistomin U (**22**) (21 mg, 0.07 mmol, 88%) as a solid, *R<sub>f</sub>* 0.29 (Al<sub>2</sub>O<sub>3</sub>, 1:1 petroleum ether/ethyl acetate), mp 235-236 °C.

<sup>1</sup>H NMR (400 MHz, DMSO-d<sub>6</sub>): δ 11.70 (s, 1H), 11.28 (s, 1H), 8.56 (d, *J* = 8.0 Hz, 1H), 8.44 (d, *J* = 5.2 Hz, 1H), 8.29 (d, *J* = 2.5 Hz, 1H), 8.22 (d, *J* = 8.0 Hz, 1H), 7.95 (d, *J* = 5.2 Hz, 1H), 7.69 (d, *J* = 8.0 Hz, 1H), 7.53 (t, *J* = 7.9 Hz, 1H), 7.51 (d, *J* = 8.0 Hz, 1H), 7.25 (t, *J* = 7.6 Hz, 1H), 7.21 (t, *J* = 7.9 Hz, 1H), 7.13 (t, *J* = 7.6 Hz, 1H); <sup>13</sup>C NMR (100 MHz, DMSO-d<sub>6</sub>) δ 140.7 (s), 140.4 (s), 138.0 (d), 136.5 (s), 132.0 (s), 128.1 (s), 127.7 (d), 126.2 (s), 125.9 (d), 122.4 (d), 122.0 (d), 121.3 (d), 121.2 (s), 119.8 (d), 119.4 (d), 113.3 (s), 112.4 (d), 111.5 (d), 111.5 (d); <sup>15</sup>N NMR (40.5 MHz, DMSO-d<sub>6</sub>) δ 114.0 (NH), 135.7 (NH), 298.8; IR (neat):  $\tilde{\nu}/\text{cm}^{-1}$  = 3406, 3056, 2967, 2927, 1721, 1624, 1563, 1454, 1235, 1042, 739. MS: *m/z* (%) = 283 (100) [M<sup>+</sup>].

Spectroscopic and analytical data are in agreement with those reported from eudistomin U isolated from the caribbean ascidian *lissoclinum fragile*.<sup>4</sup>

<sup>4</sup> A. Badre, A. Boulanger, E. Abou-Mansour, B. Banaigs, G. Combaut, C. Francisco, *J. Nat. Prod.*, 1994, **57**, 528.

## IV Selected NMR spectra

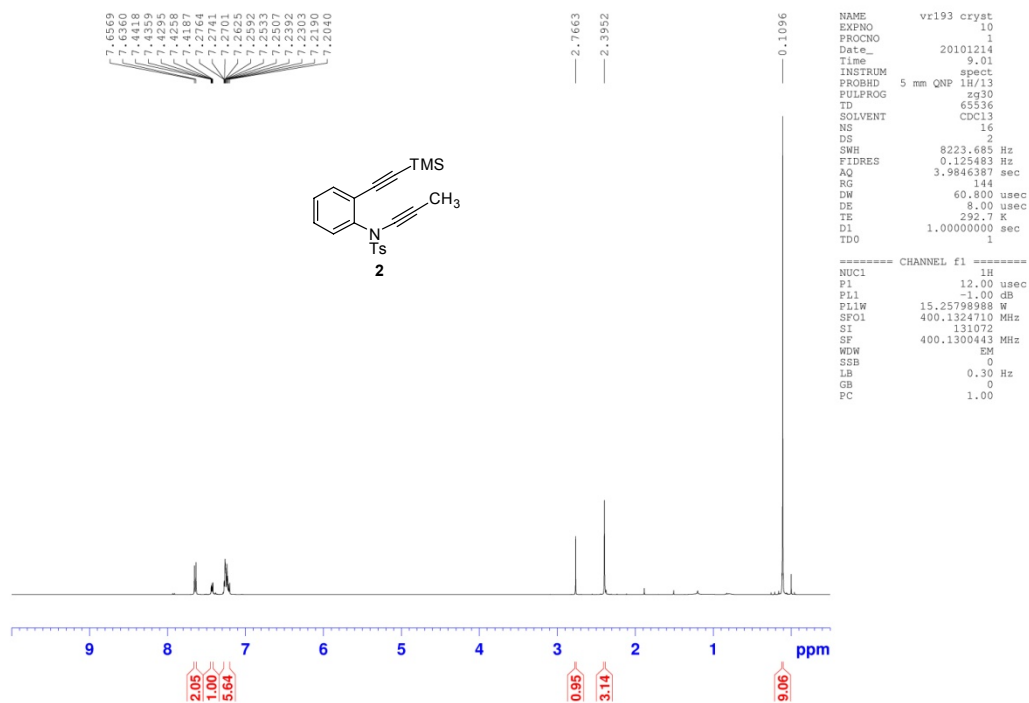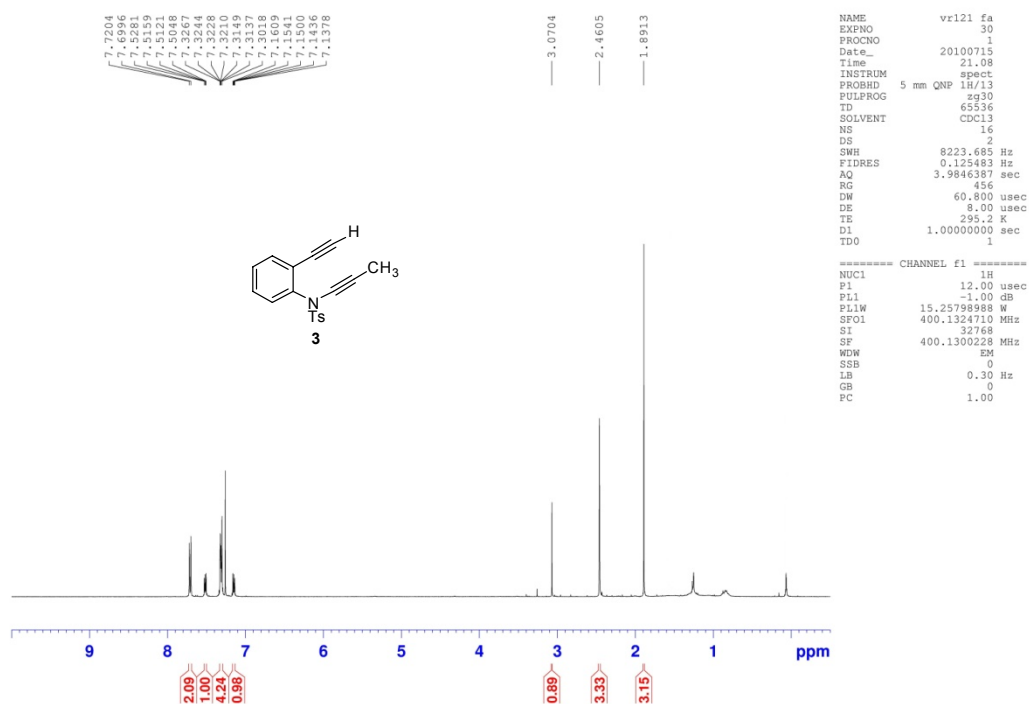

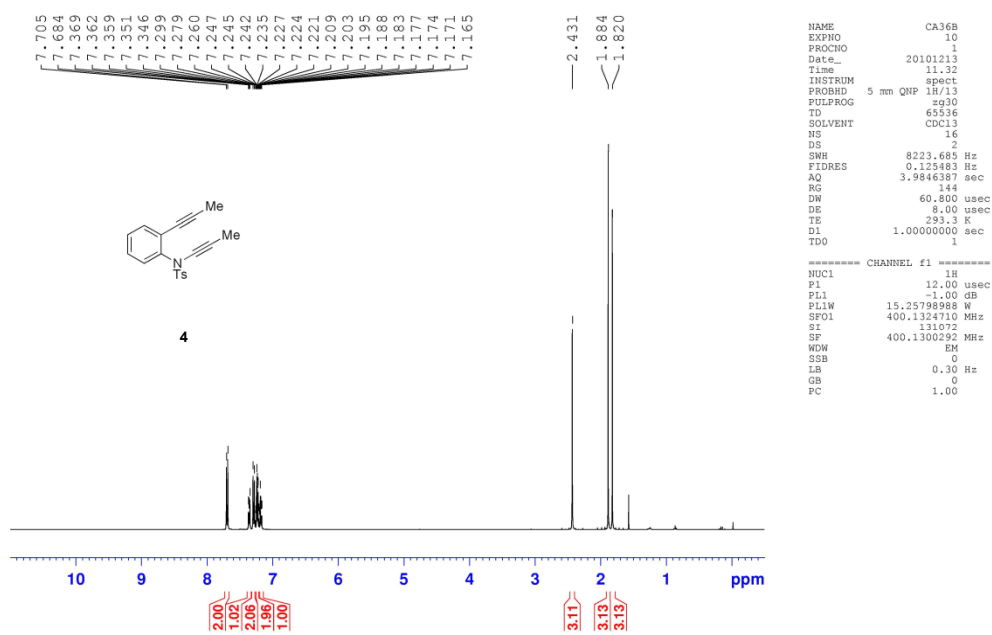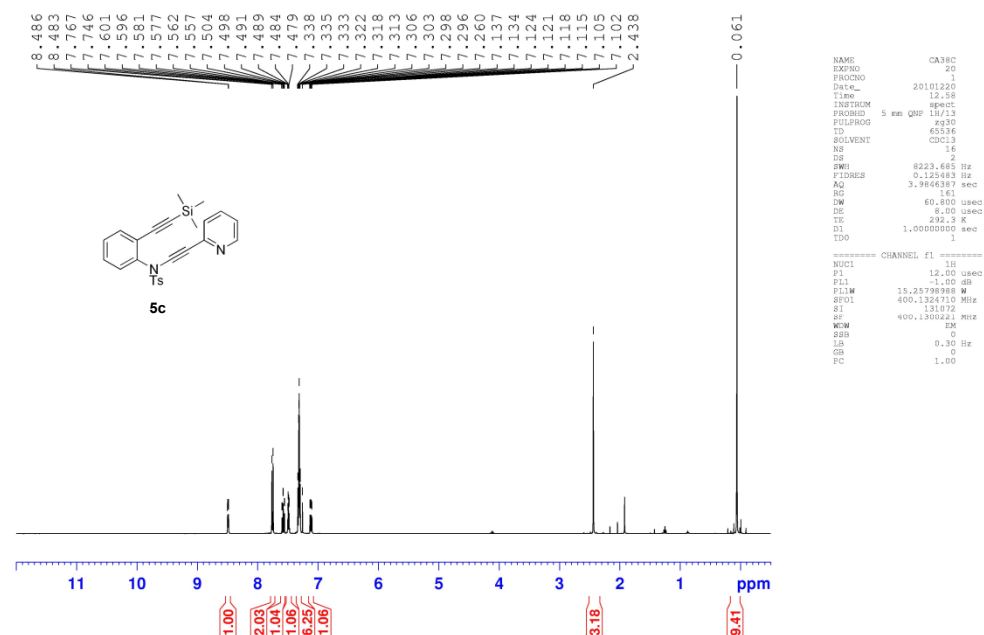

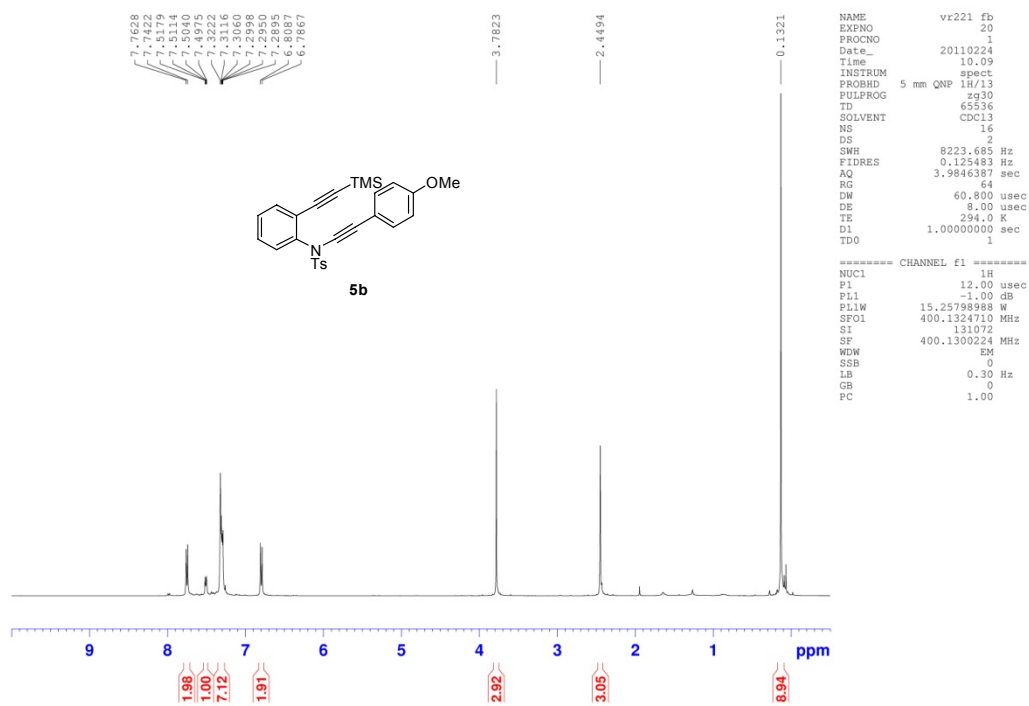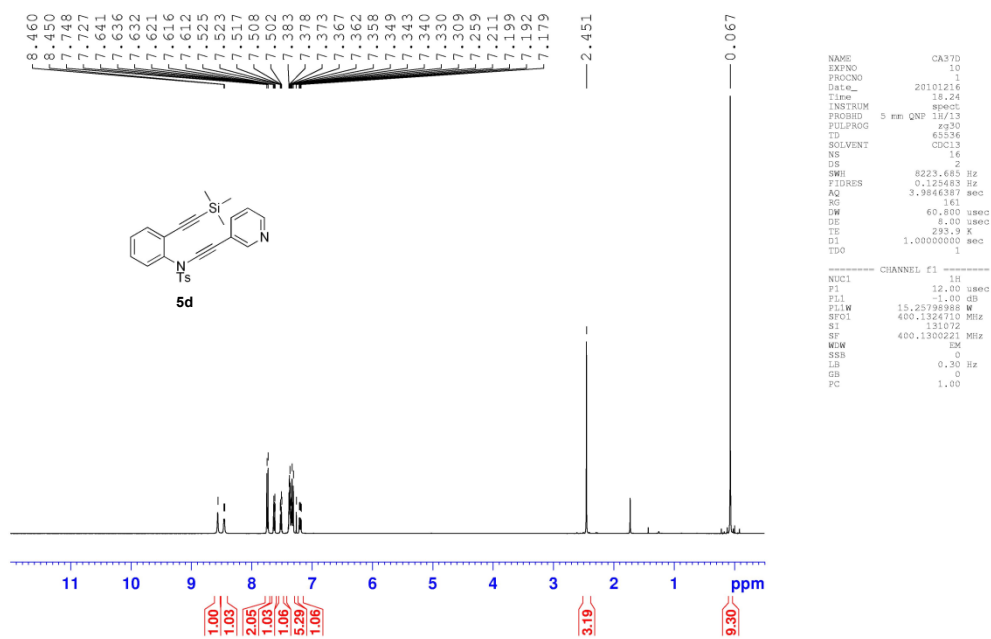

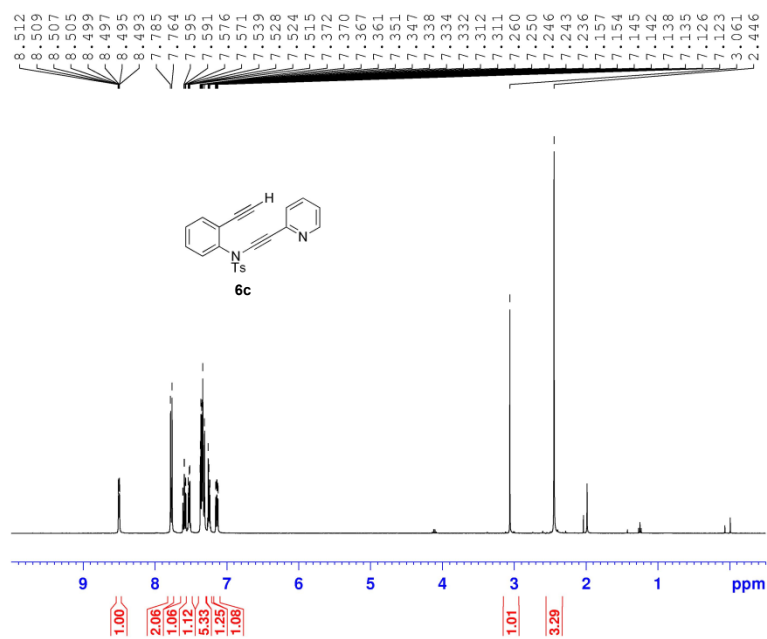

```

NAME          CA40
EXPNO         10
PROCNO        1
Date_         20101220
Time          13.57
INSTRUM       spect
PROBHD        5 mm QNP
PULPROG       zg30
TD            65536
SOLVENT       CDCl3
NS            16
DS            2
SWH           8223.685 Hz
FIDRES        0.125483 Hz
AQ            3.9846387 sec
RG            181
DW            60.800 usec
DE            8.00 usec
TE            292.3 K
D1            1.00000000 sec
TDO           1

----- CHANNEL f1 -----
NUC1          1H
P1            12.00 usec
PL1           -1.00 dB
PL1W          15.25798988 W
SF01          400.1324710 MHz
SI            131072
SF            400.1300218 MHz
WDW           EM
SGB           0
LB            0.30 Hz
GB            0
PC            1.00
    
```

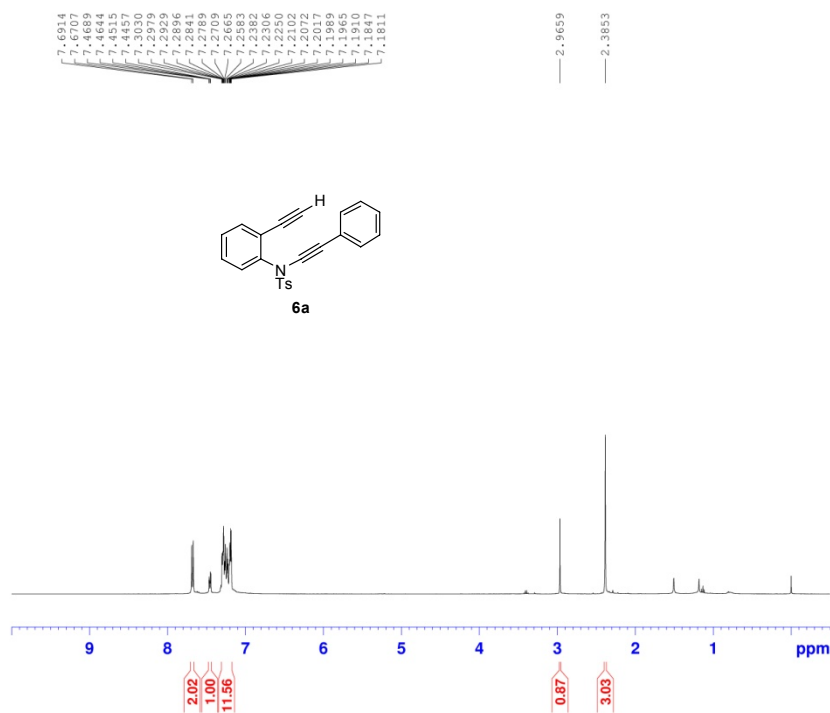

```

NAME          VR192 CRYST
EXPNO         10
PROCNO        1
Date_         20110225
Time          15.08
INSTRUM       spect
PROBHD        5 mm QNP
PULPROG       zg30
TD            65536
SOLVENT       CDCl3
NS            16
DS            2
SWH           8223.685 Hz
FIDRES        0.125483 Hz
AQ            3.9846387 sec
RG            181
DW            60.800 usec
DE            8.00 usec
TE            293.9 K
D1            1.00000000 sec
TDO           1

===== CHANNEL f1 =====
NUC1          1H
P1            12.00 usec
PL1           -1.00 dB
PL1W          15.25798988 W
SF01          400.1324710 MHz
SI            131072
SF            400.1300535 MHz
WDW           EM
SGB           0
LB            0.30 Hz
GB            0
PC            1.00
    
```

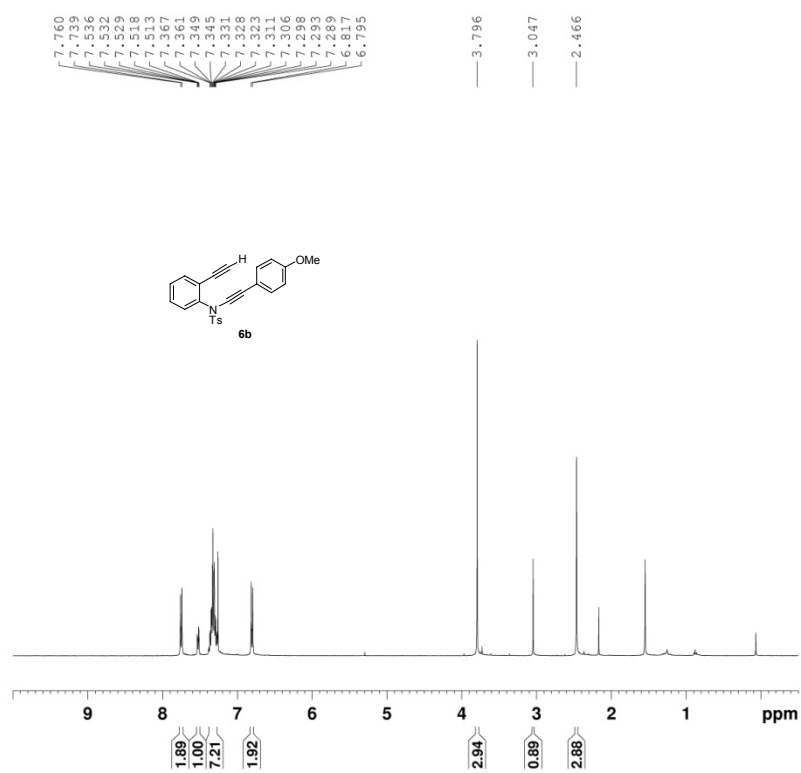

```

NAME          vr225 fa
EXPNO         30
PROCNO        1
Date_         20110303
Time          3.18
INSTRUM       spect
PROBHD        5 mm QNP 1H/13
PULPROG       zg30
TD            65536
SOLVENT       CDCl3
NS            16
DS            2
SWH           8223.685 Hz
FIDRES        0.125483 Hz
AQ            3.9846387 sec
RG            406
DW            60.800 usec
DE            8.00 usec
TE            295.2 K
D1            1.00000000 sec
TDO           1
  
```

```

===== CHANNEL f1 =====
NUC1          1H
P1            6.00 usec
PL1          -5.00 dB
PL1W         38.32633591 W
SFO1         400.1324710 MHz
SI           131072
SF           400.1300229 MHz
WDW           EM
SSB           0
LB            0.30 Hz
GB            0
PC            1.00
  
```

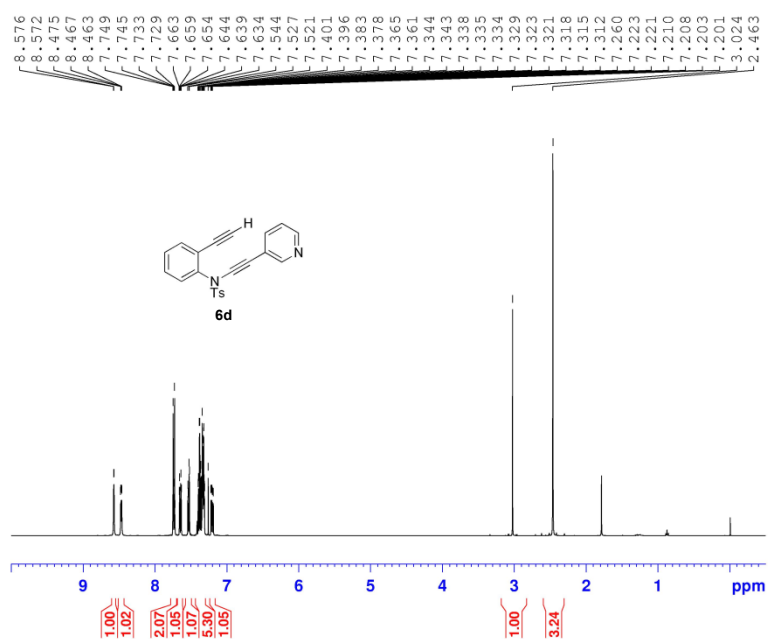

```

NAME          CA39B
EXPNO         10
PROCNO        1
Date_         20101221
Time          13.51
INSTRUM       spect
PROBHD        5 mm QNP 1H/13
PULPROG       zg30
TD            65536
SOLVENT       CDCl3
NS            16
DS            2
SWH           8223.685 Hz
FIDRES        0.125483 Hz
AQ            3.9846387 sec
RG            161
DW            60.800 usec
DE            8.00 usec
TE            292.8 K
D1            1.00000000 sec
TDO           1
  
```

```

===== CHANNEL f1 =====
NUC1          1H
P1            12.00 usec
PL1          -1.00 dB
PL1W         15.25798988 W
SFO1         400.1324710 MHz
SI           131072
SF           400.1300219 MHz
WDW           EM
SSB           0
LB            0.30 Hz
GB            0
PC            1.00
  
```

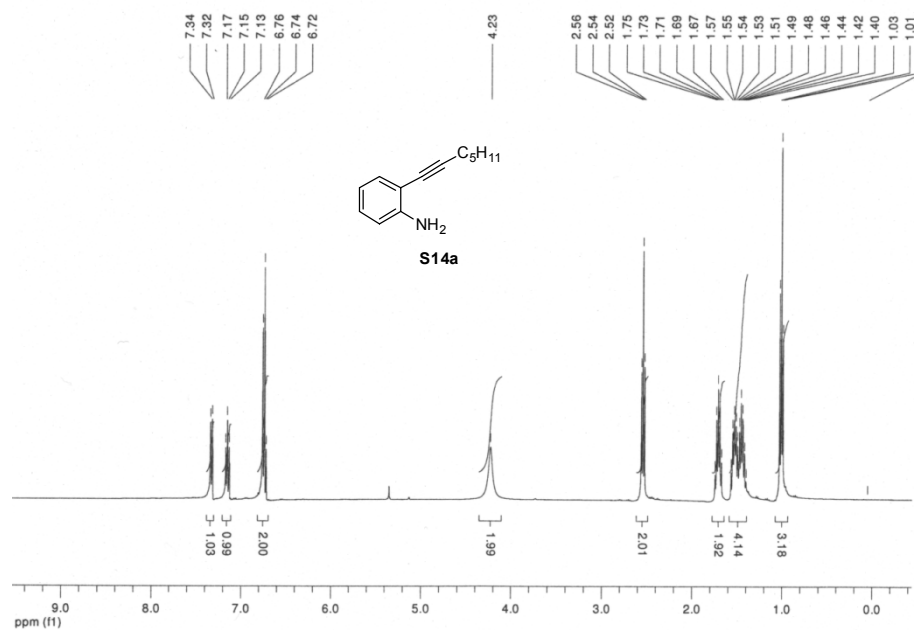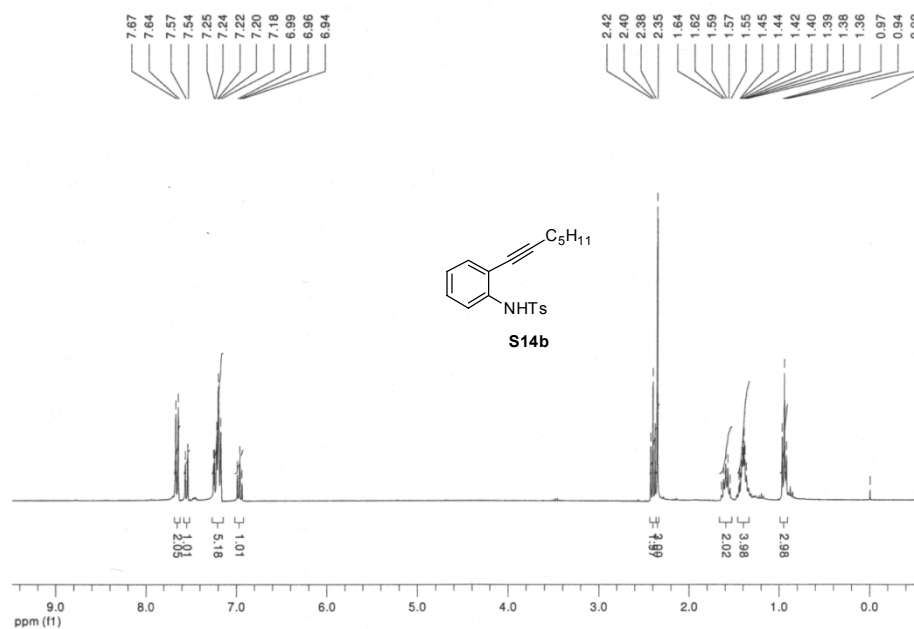



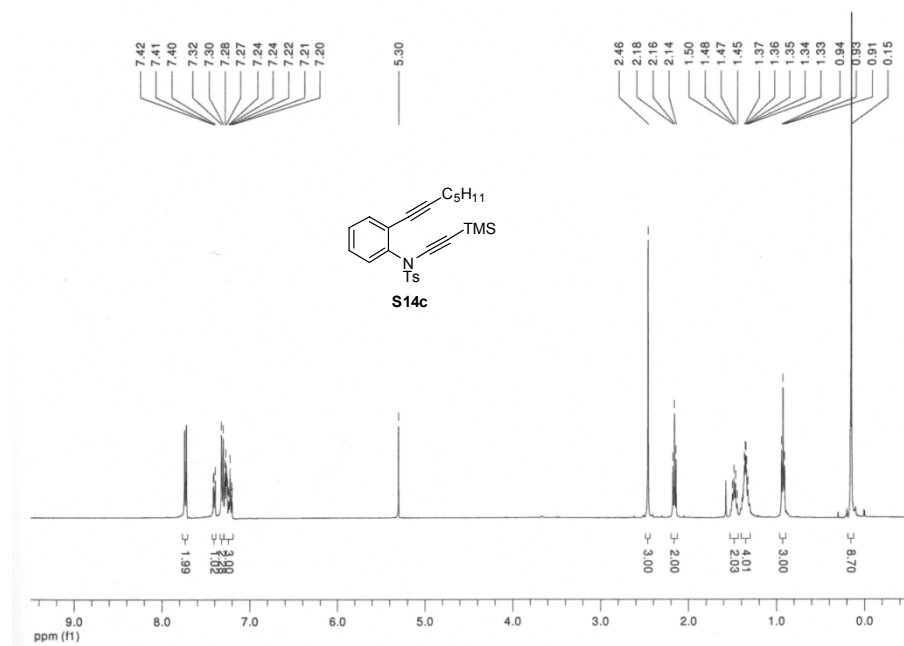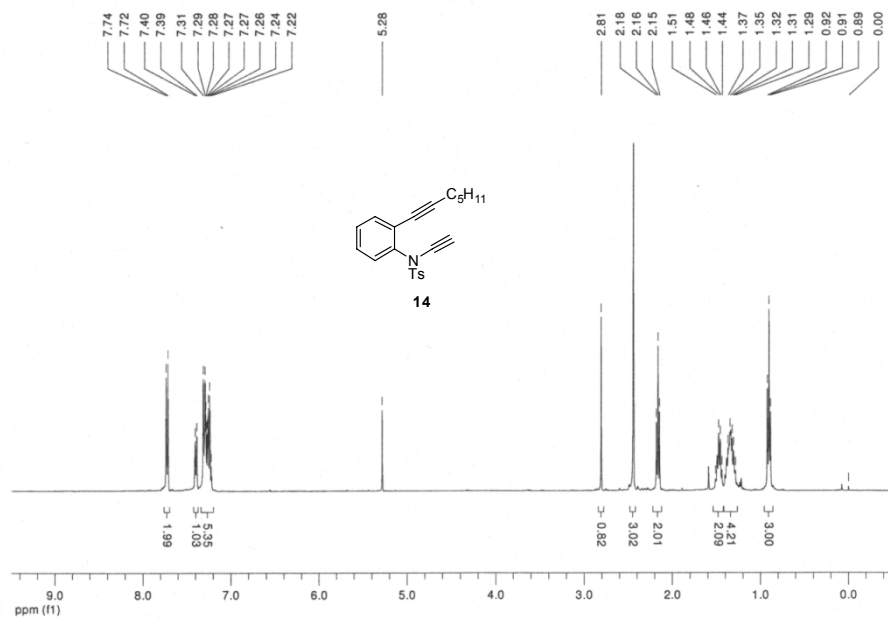

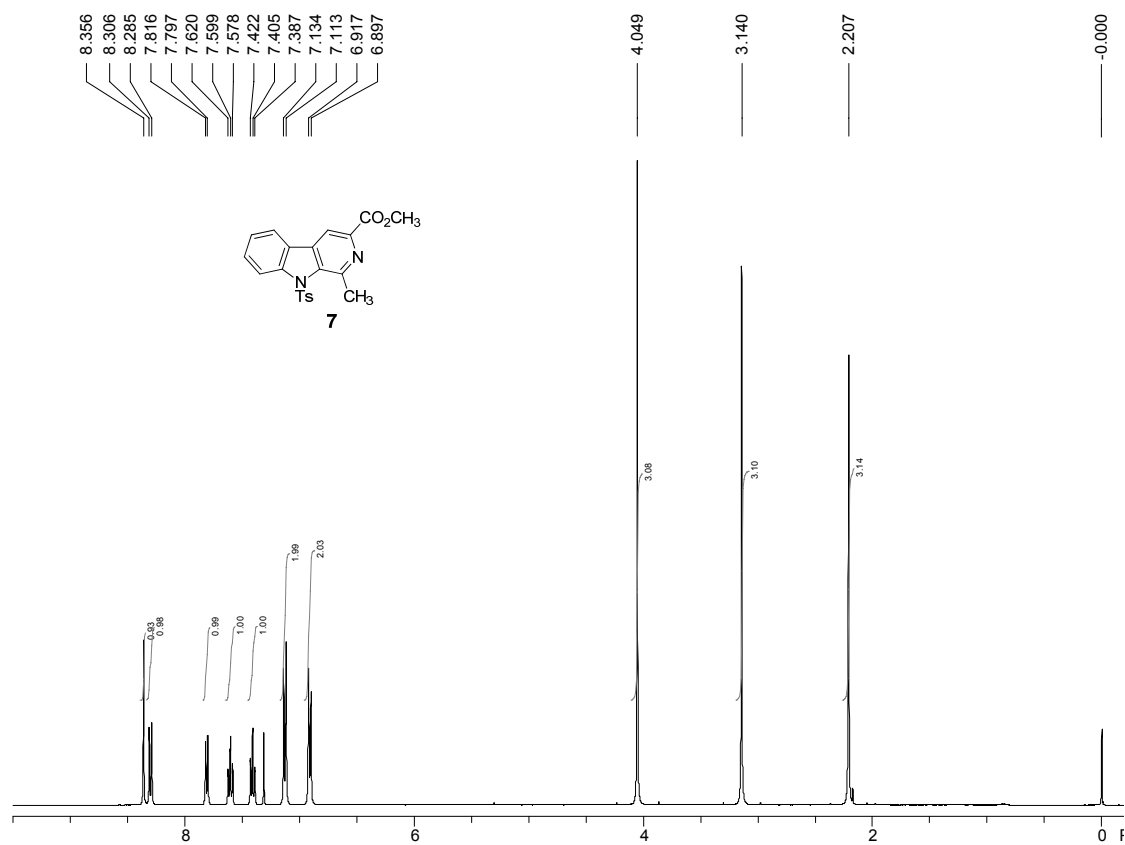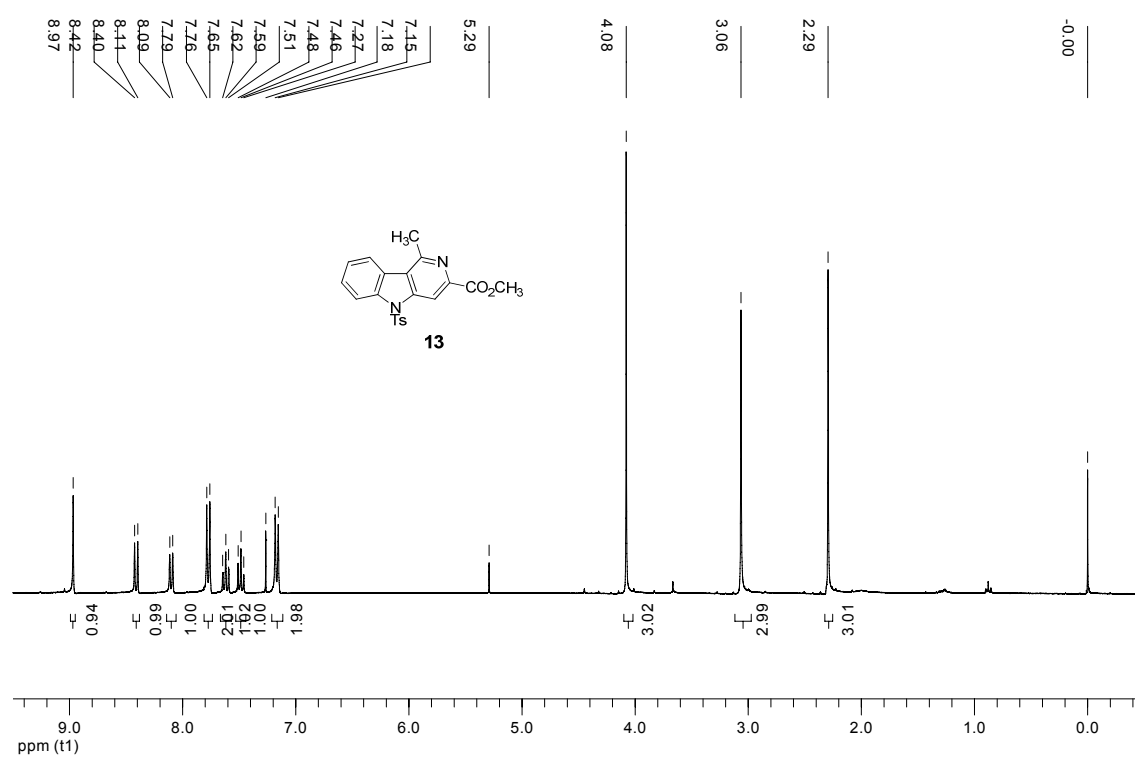

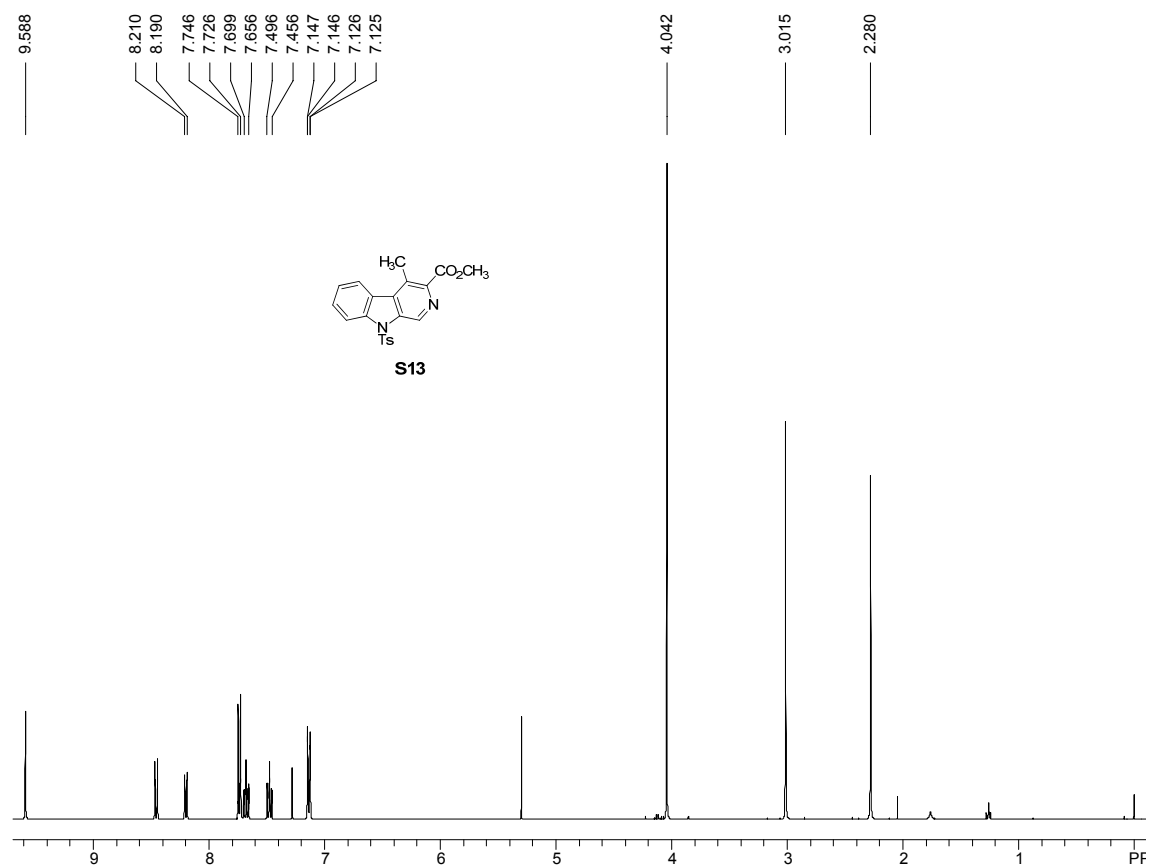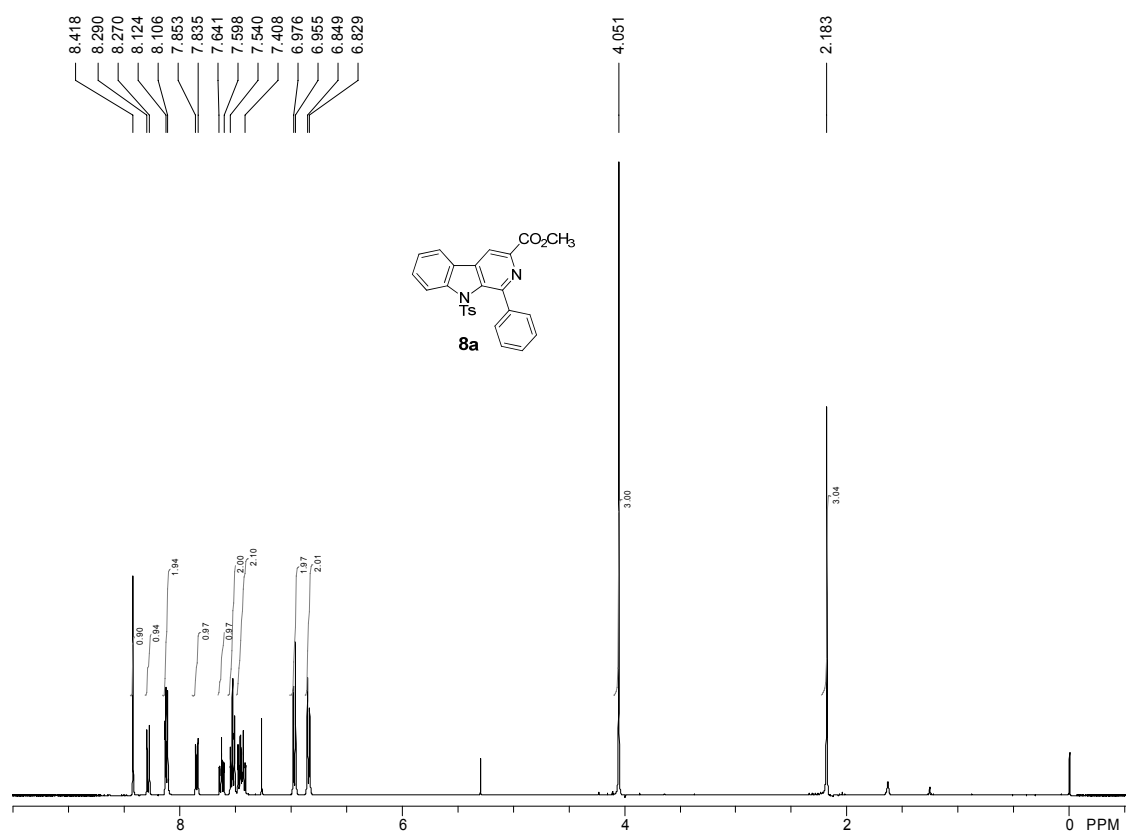

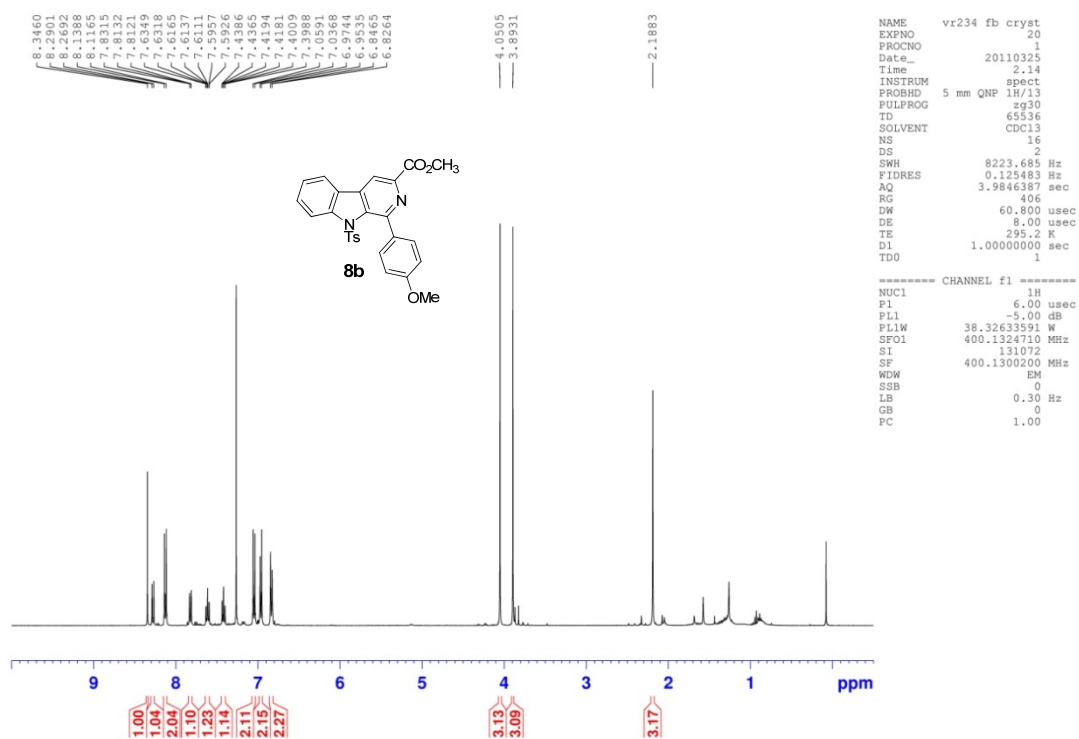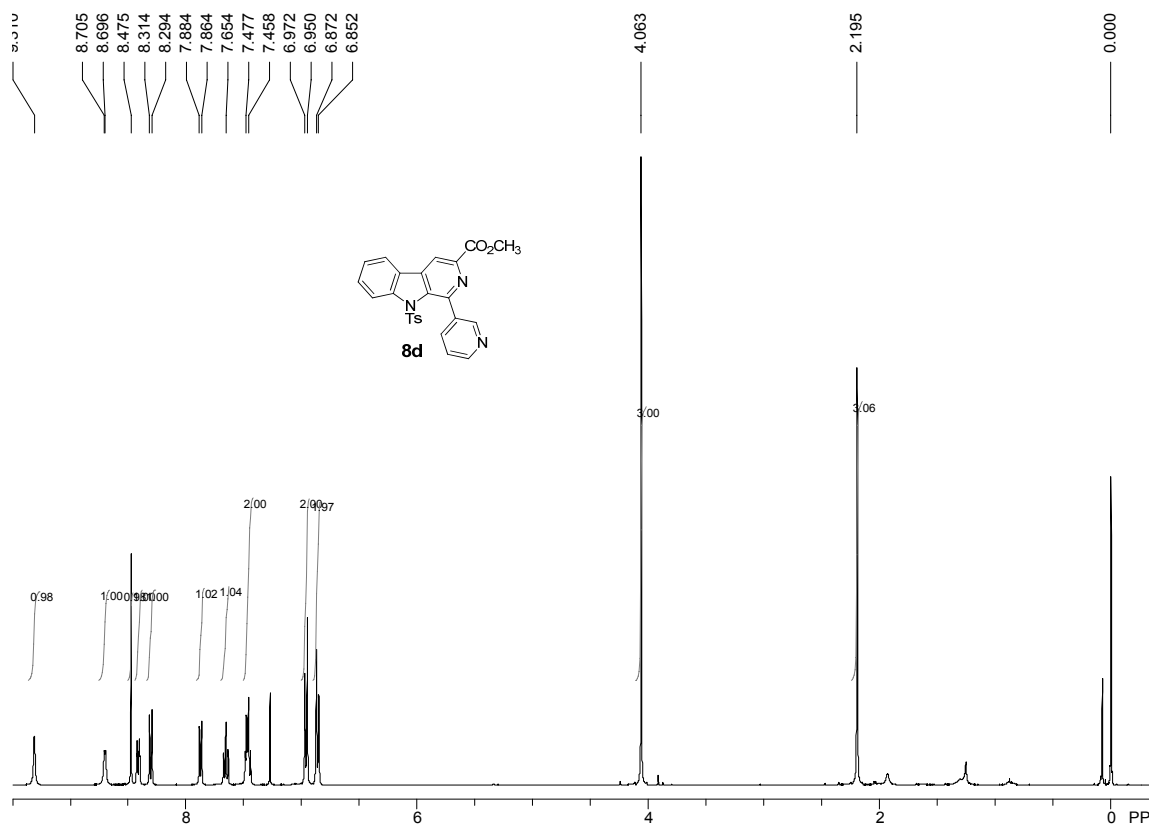

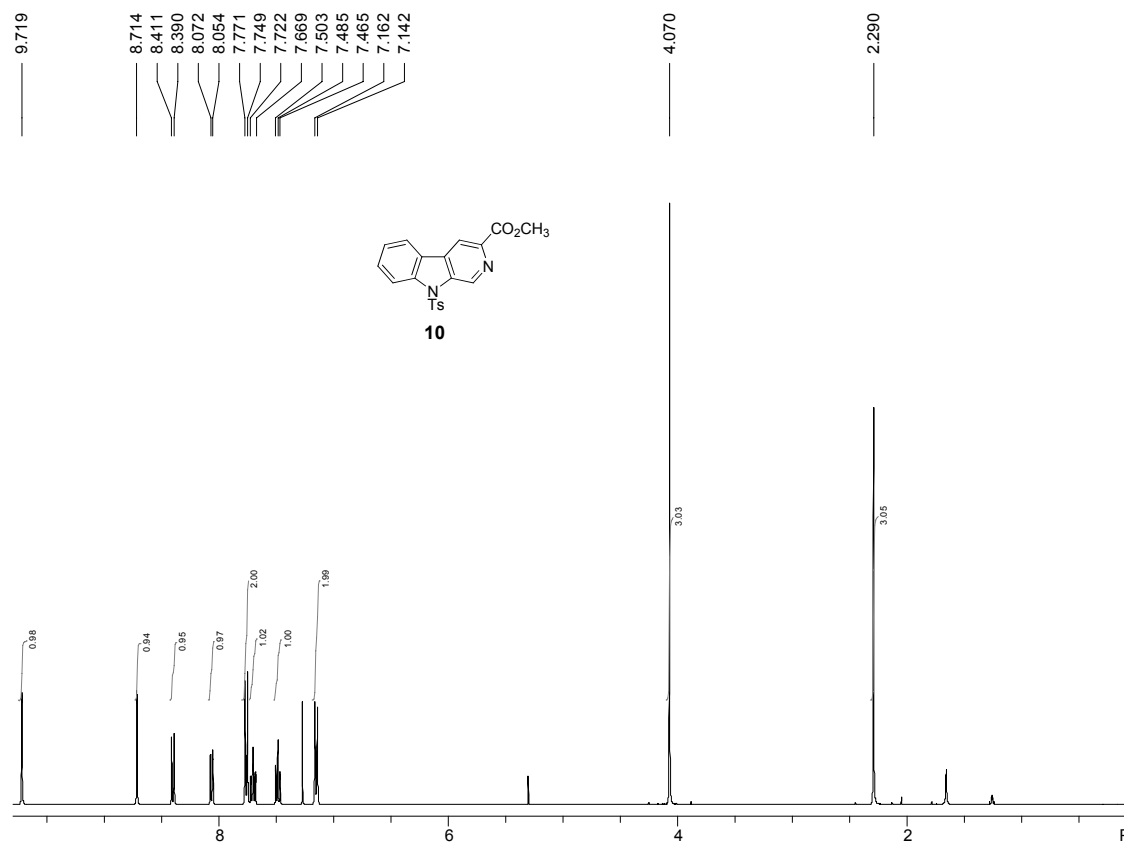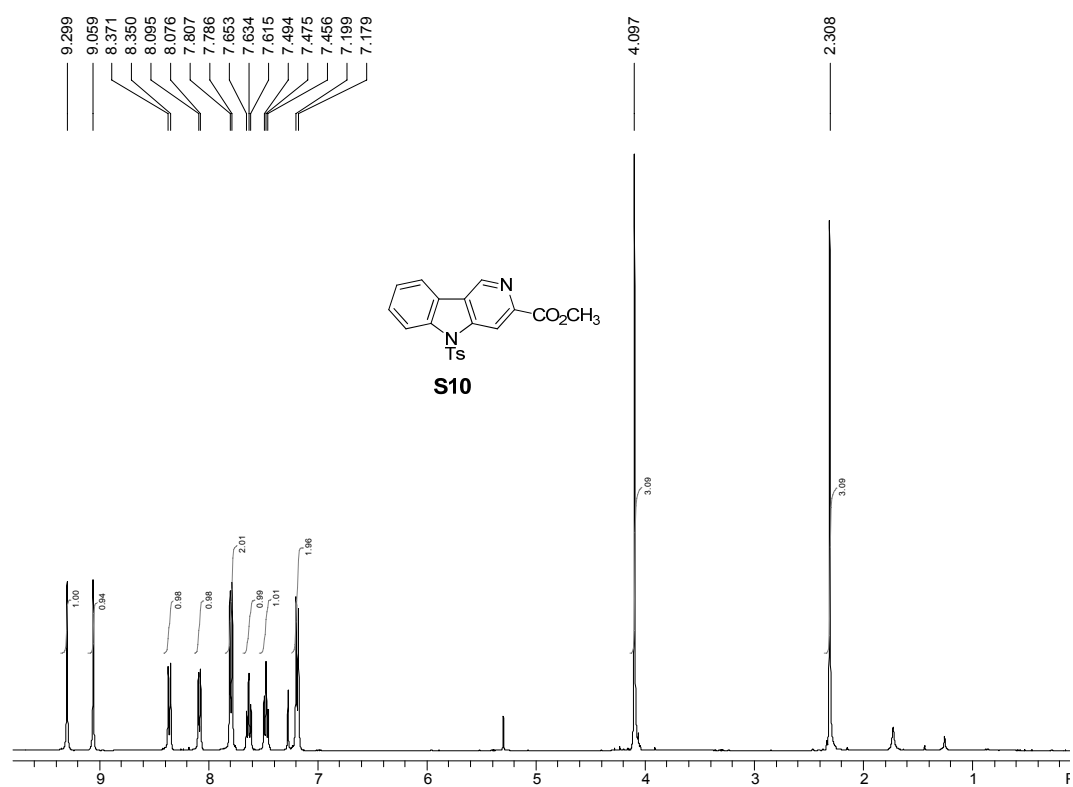

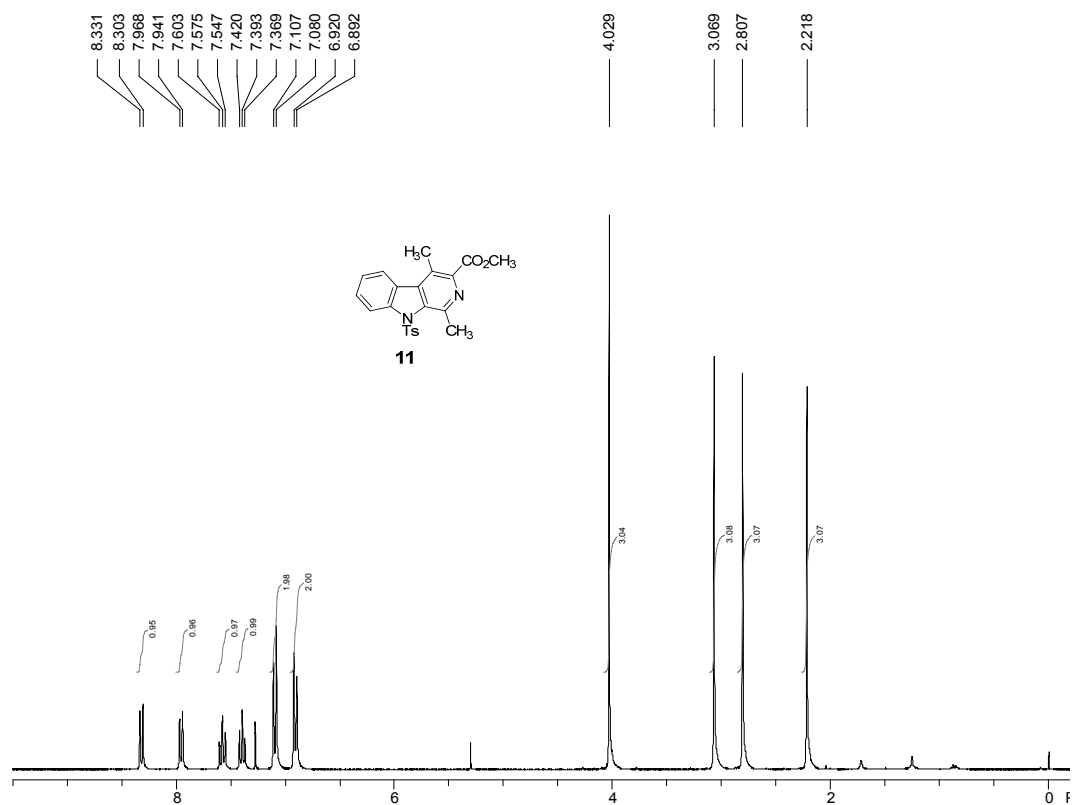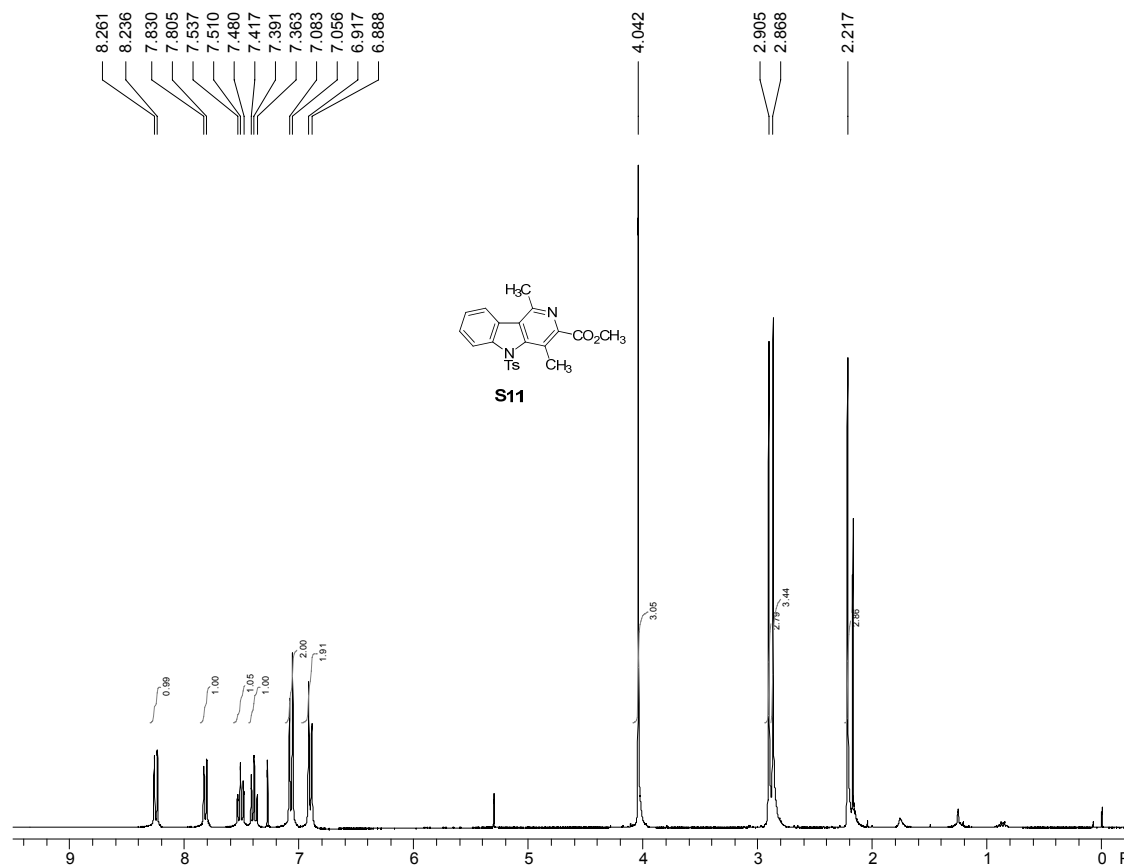

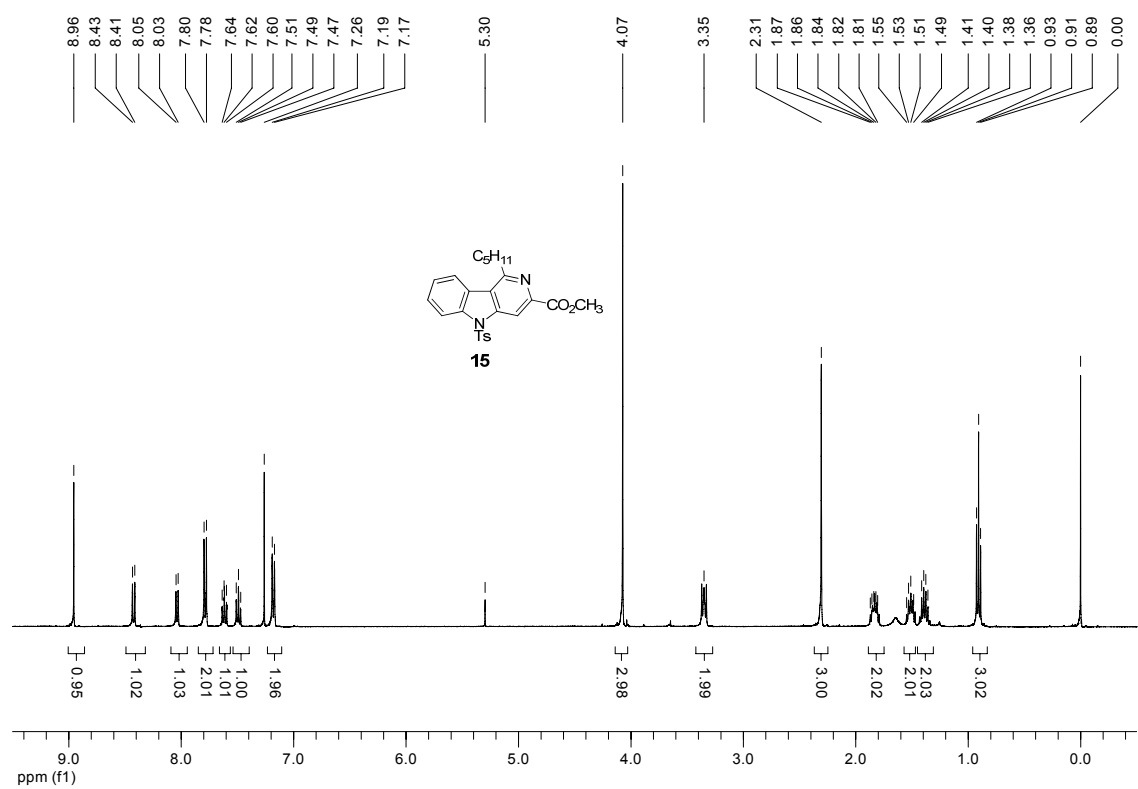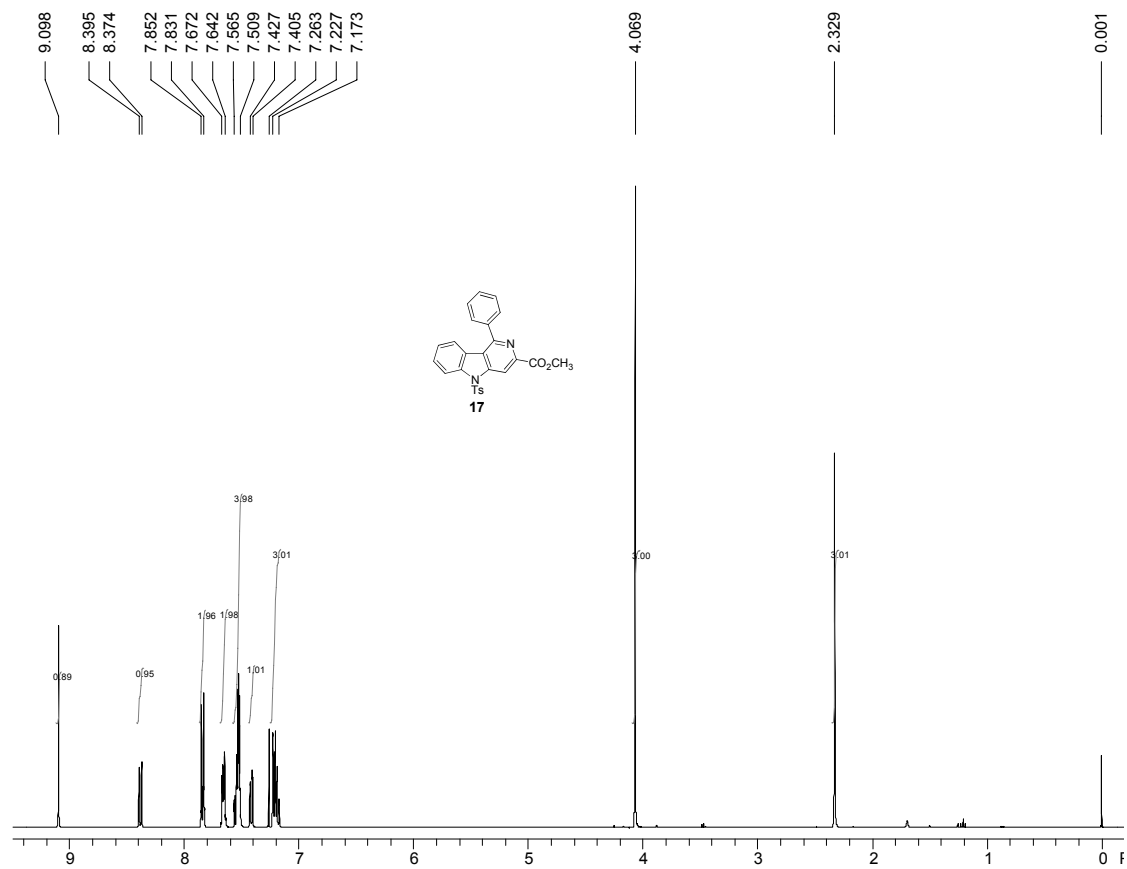

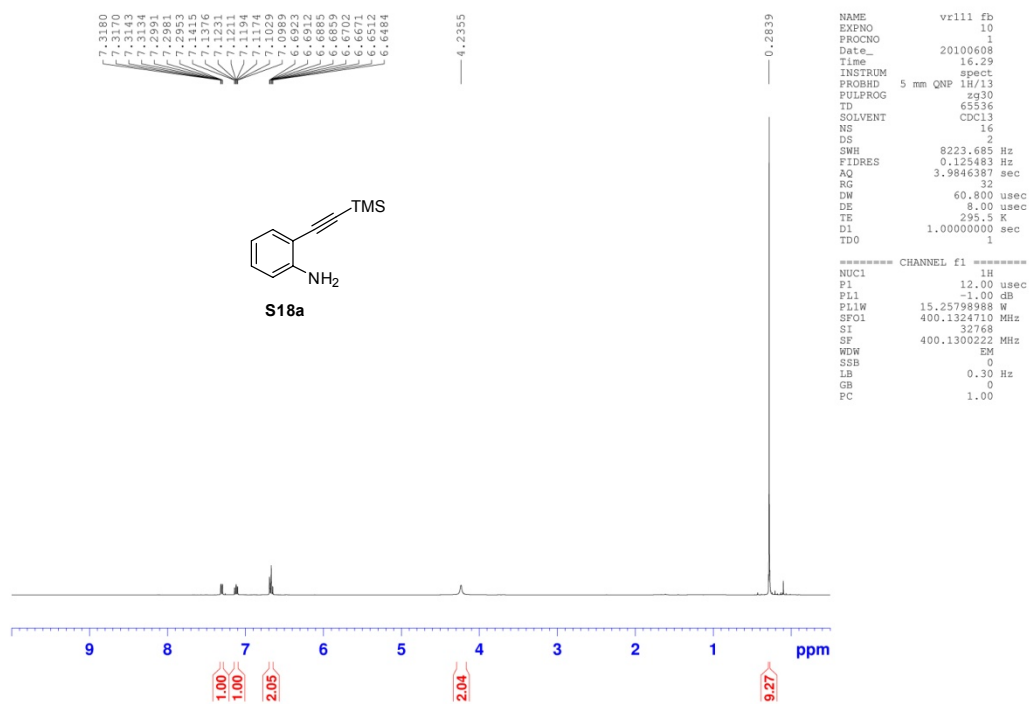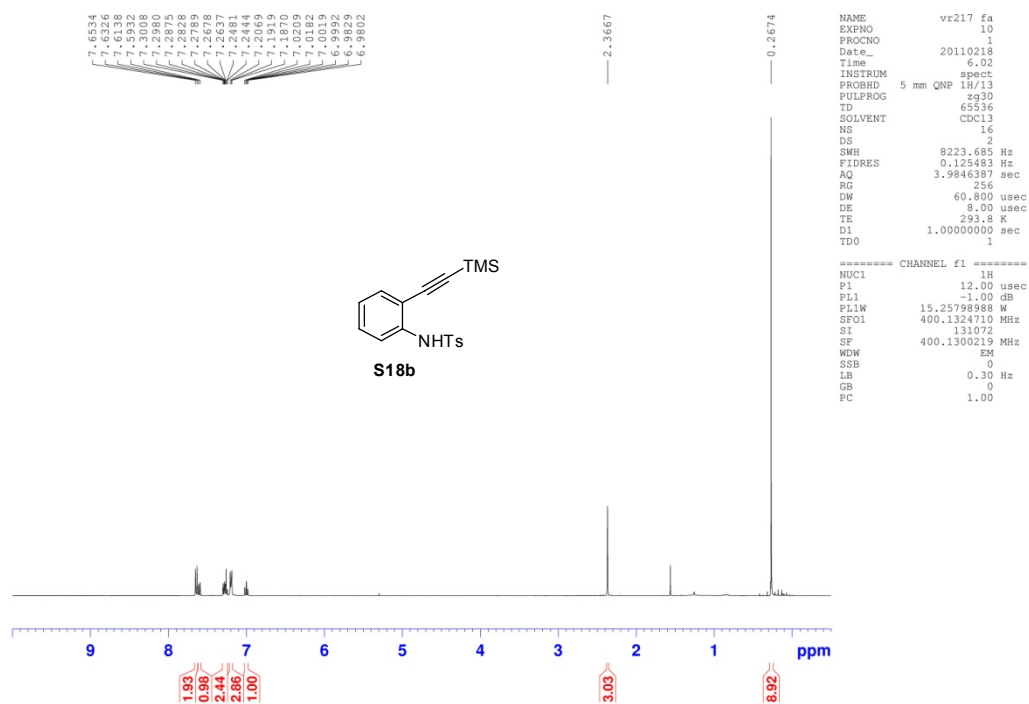



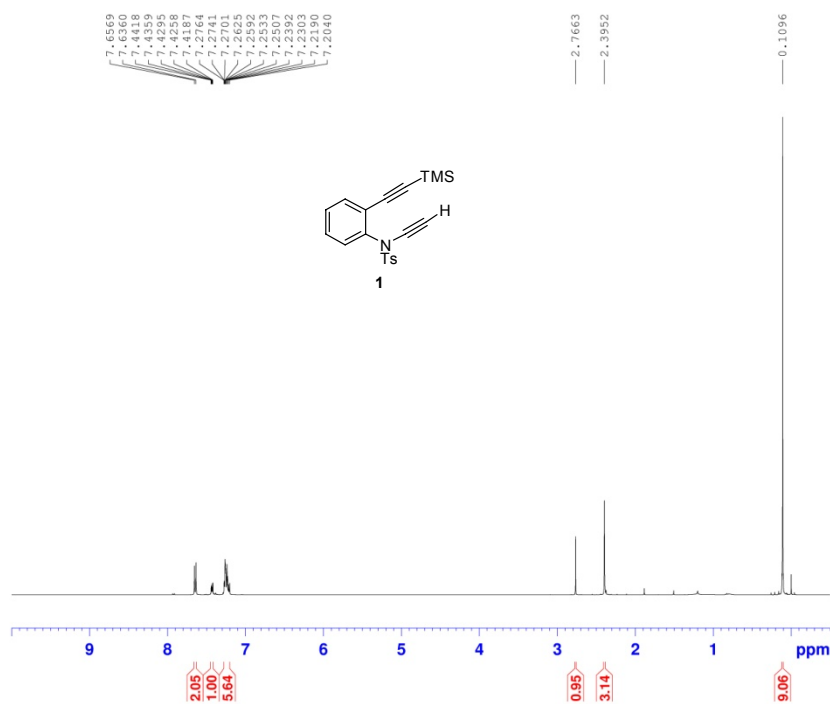

```

NAME      vr193 cryst
EXPNO    10
PROCNO   1
Date_    20101214
Time     9.01
INSTRUM  spect
PROBHD   5 mm QNP 1H/13
PULPROG  zg30
TD       65536
SOLVENT  CDCl3
NS       16
DS       2
SWH      8223.685 Hz
FIDRES   0.125483 Hz
AQ       3.9846387 sec
RG       144
DW       60.800 usec
DE       8.00 usec
TE       292.7 K
D1       1.00000000 sec
TD0      1

===== CHANNEL f1 =====
NUC1     1H
P1       12.00 usec
PL1      -1.00 dB
PL1W    15.25798988 W
SFO1    400.1324710 MHz
SI       131072
SF       400.1300443 MHz
WDW      EM
SSB      0
LB       0.30 Hz
GB       0
FC       1.00
    
```

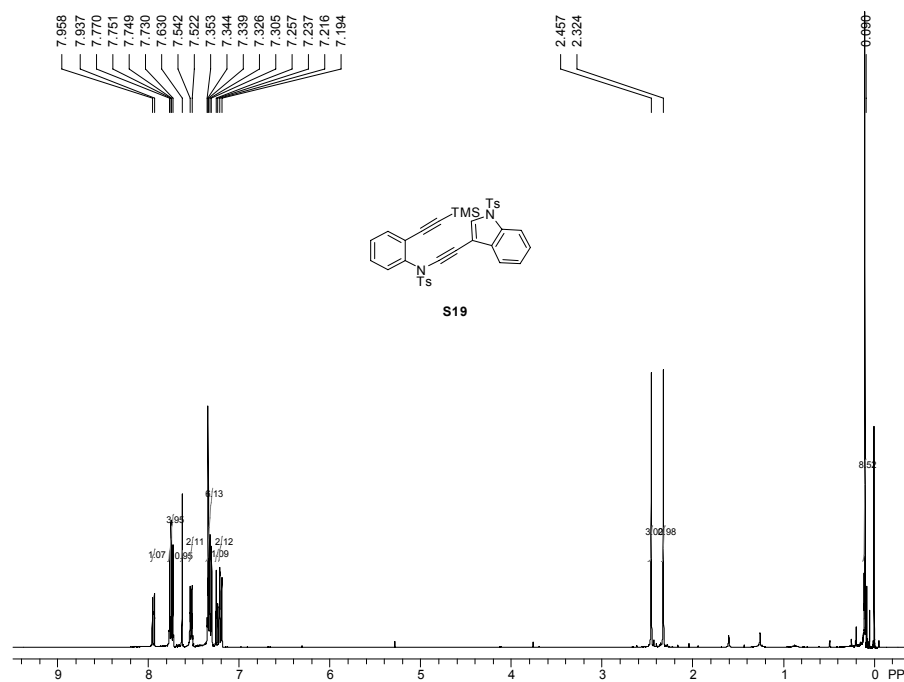

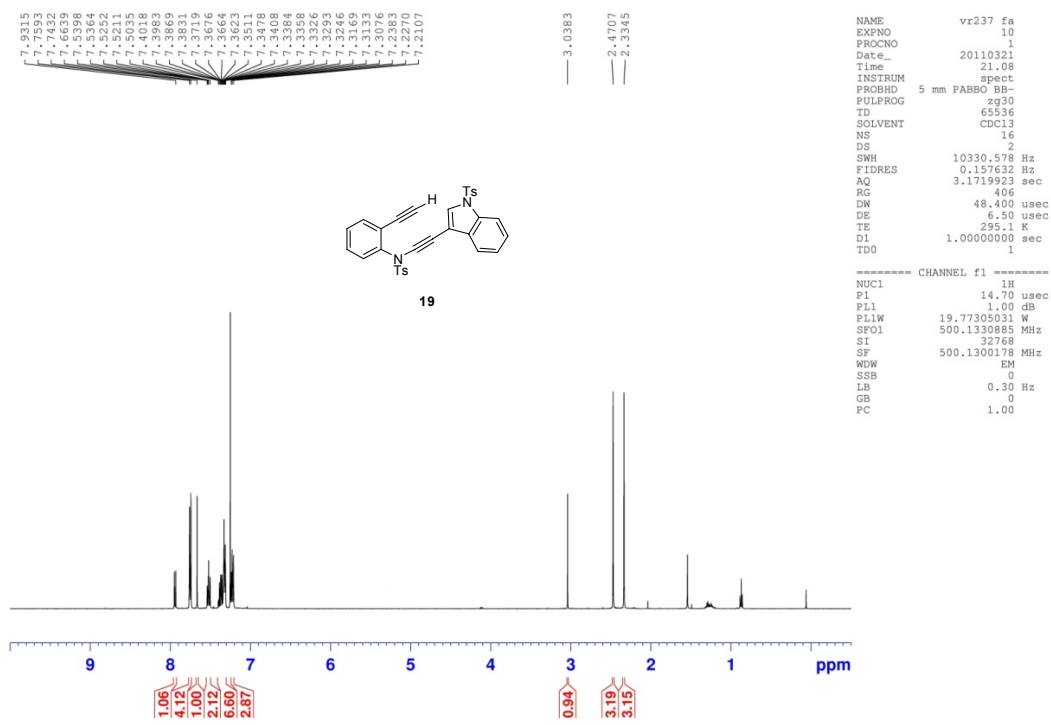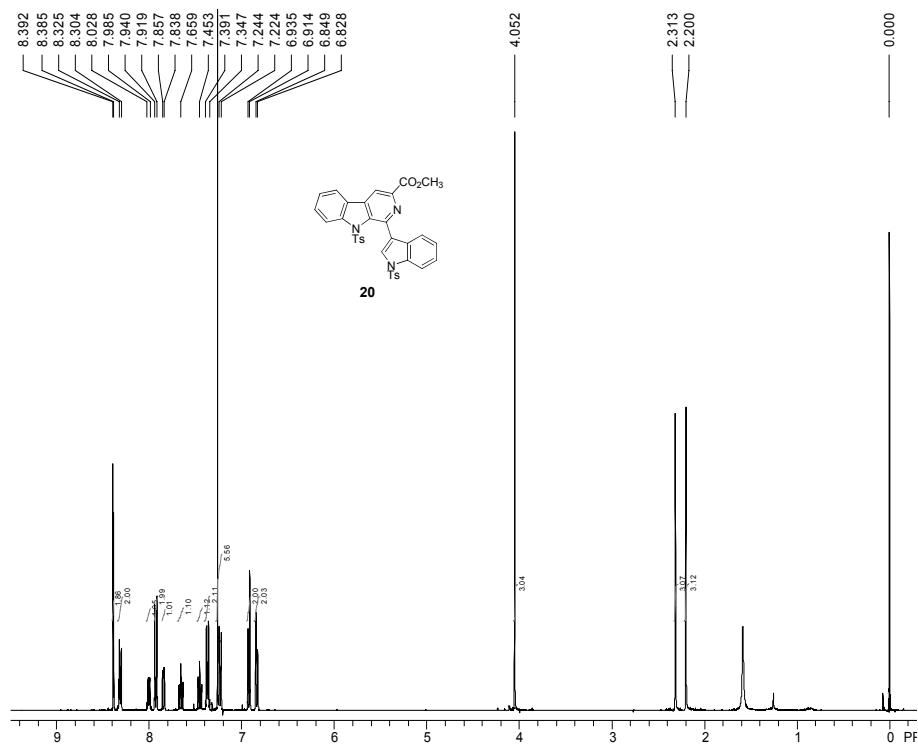

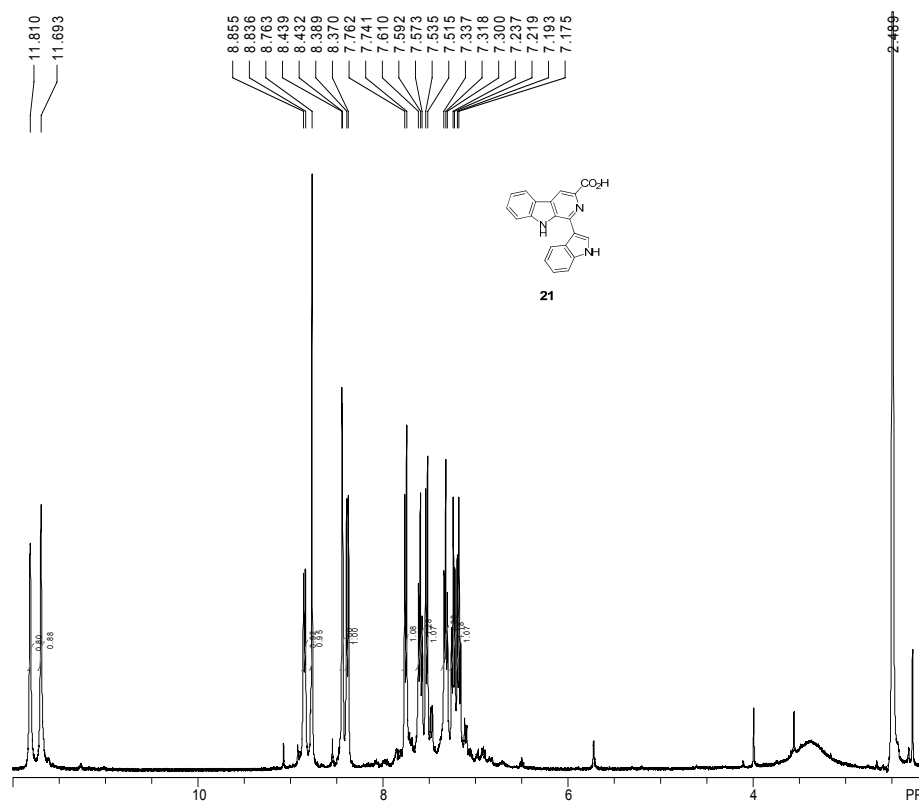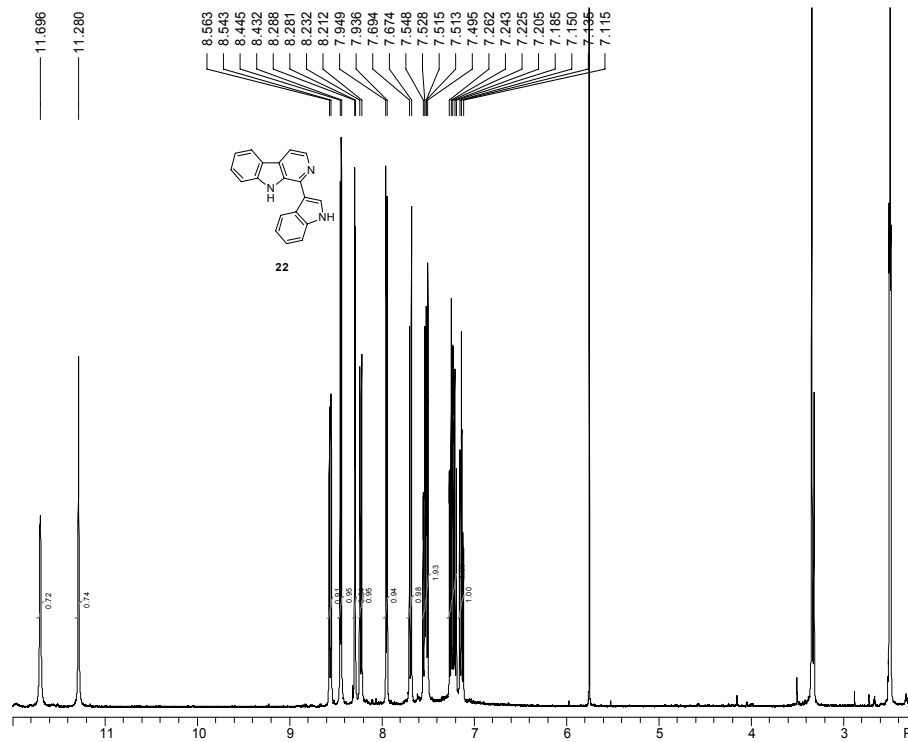

Supplement: c1cc11298h.pdf [file c1cc11298h.pdf]
